# Supplementary material
Source: PubMed Central journal article supplement (PMC4734386)

## SUPPORTING INFORMATION

### Total Synthesis of the Potent Marine-Derived Elastase Inhibitor Lyngbyastatin 7 and in Vitro Biological Evaluation in Model Systems for Pulmonary Diseases

Danmeng Luo,<sup>†,‡</sup> Qi-Yin Chen,<sup>†,‡</sup> and Hendrik Luesch<sup>\*,†,‡</sup>

<sup>†</sup>Department of Medicinal Chemistry, University of Florida, Gainesville, Florida 32610, United States

<sup>‡</sup>Center for Natural Products, Drug Discovery and Development (CNP3), University of Florida, Gainesville, Florida 32610, United States

|                                                                                                                                 | Pages  |
|---------------------------------------------------------------------------------------------------------------------------------|--------|
| <b>Table of Contents:</b>                                                                                                       |        |
| Figure S1. Proposed structures of the side products generated in deprotection of the linear macrocyclization precursor <b>5</b> | S2     |
| Figure S2. Comparison of <sup>1</sup> H NMR spectrum of natural lyngbyastatin 7 and synthetic lyngbyastatin 7 ( <b>1</b> ).     | S3     |
| Figure S3. Comparison of <sup>13</sup> C NMR spectrum of natural lyngbyastatin 7 and synthetic lyngbyastatin 7 ( <b>1</b> ).    | S4     |
| Figures S4-S7. HPLC profiles of natural lyngbyastatin 7 and synthetic lyngbyastatin 7 ( <b>1</b> ).                             | S5-S8  |
| <sup>1</sup> H and <sup>13</sup> C NMR spectra of synthetic compounds                                                           | S9-S42 |

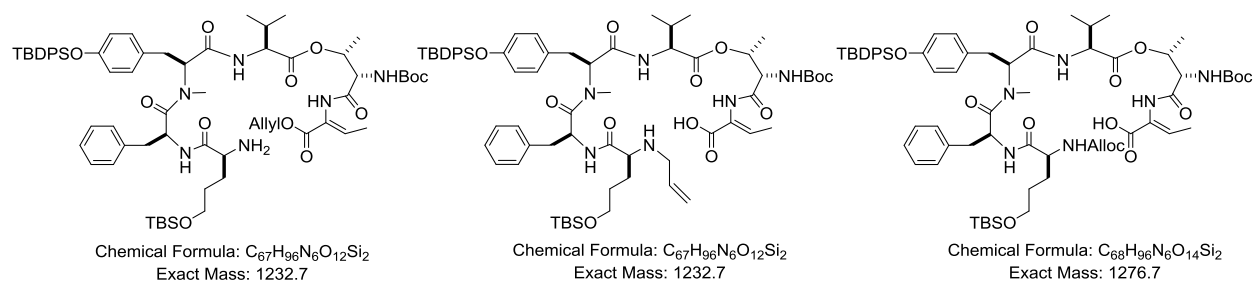

**Figure S1.** Proposed structures of the side products generated in the deprotection of the linear macrocyclization precursor **5**. When using morpholine, *N*-methylaniline, dimedone as allyl group scavengers, upon treating with  $Pd(PPh_3)_4$  for 2 h we detected molecular ion peaks 1299.8 and 1233.8 as major peaks by ESI-LRMS (positive mode). Peak 1299.8 was considered as a side product of which the Alloc group was still attached ( $[M+Na]^+$   $1276.7+23=1299.7$ ). Peak 1233.8 was suspected as the compound with allyl group still attached or a decarboxylative rearrangement side product ( $[M+H]^+$   $1232.7+1=1233.7$ ).

$^1\text{H}$  NMR Spectrum of Natural Lyngbyastatin 7 in  $(\text{CD}_3)_2\text{SO}$  (600 MHz) at 27 °C

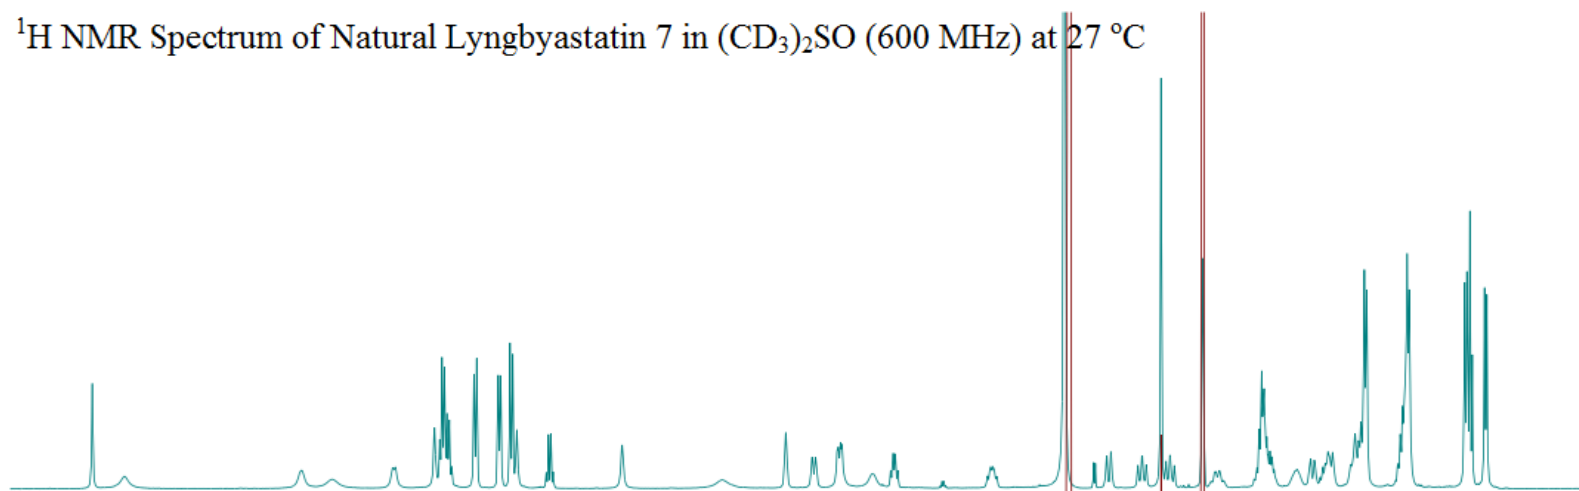

$^1\text{H}$  NMR Spectrum of Synthetic Lyngbyastatin 7 (**1**) in  $(\text{CD}_3)_2\text{SO}$  (600 MHz) at 27 °C

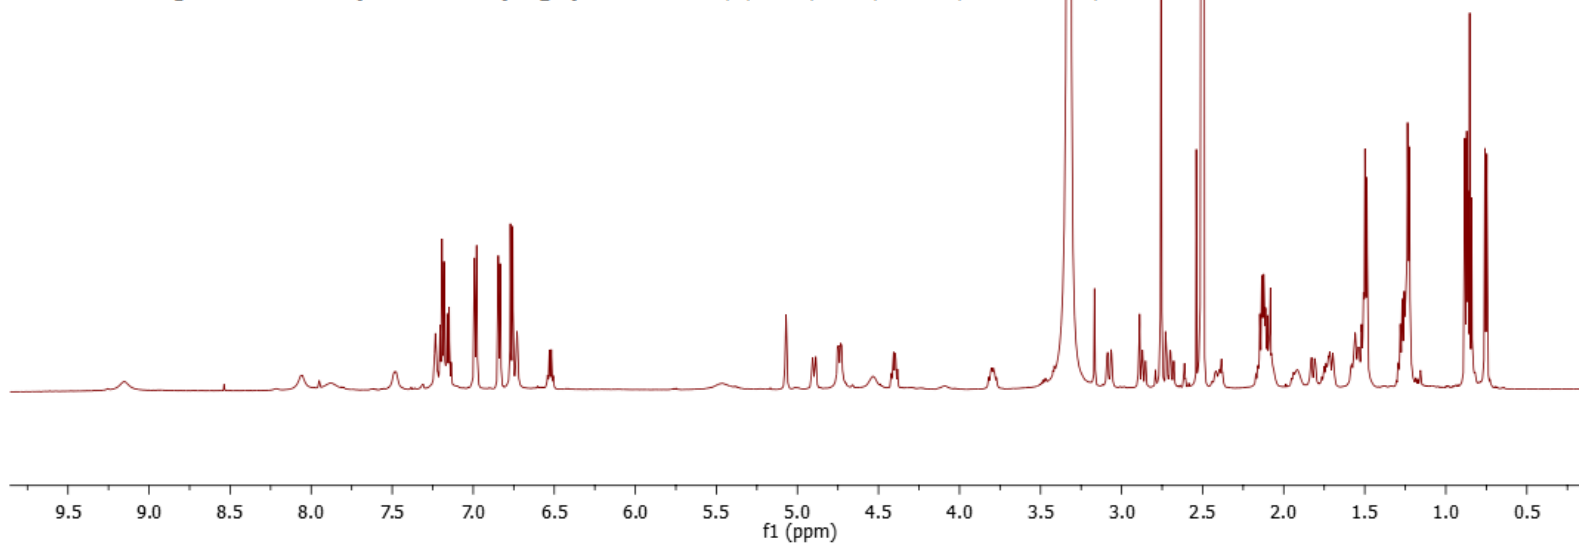

**Figure S2.** Comparison of  $^1\text{H}$  NMR spectrum of natural lyngbyastatin 7 and synthetic lyngbyastatin 7 (**1**).

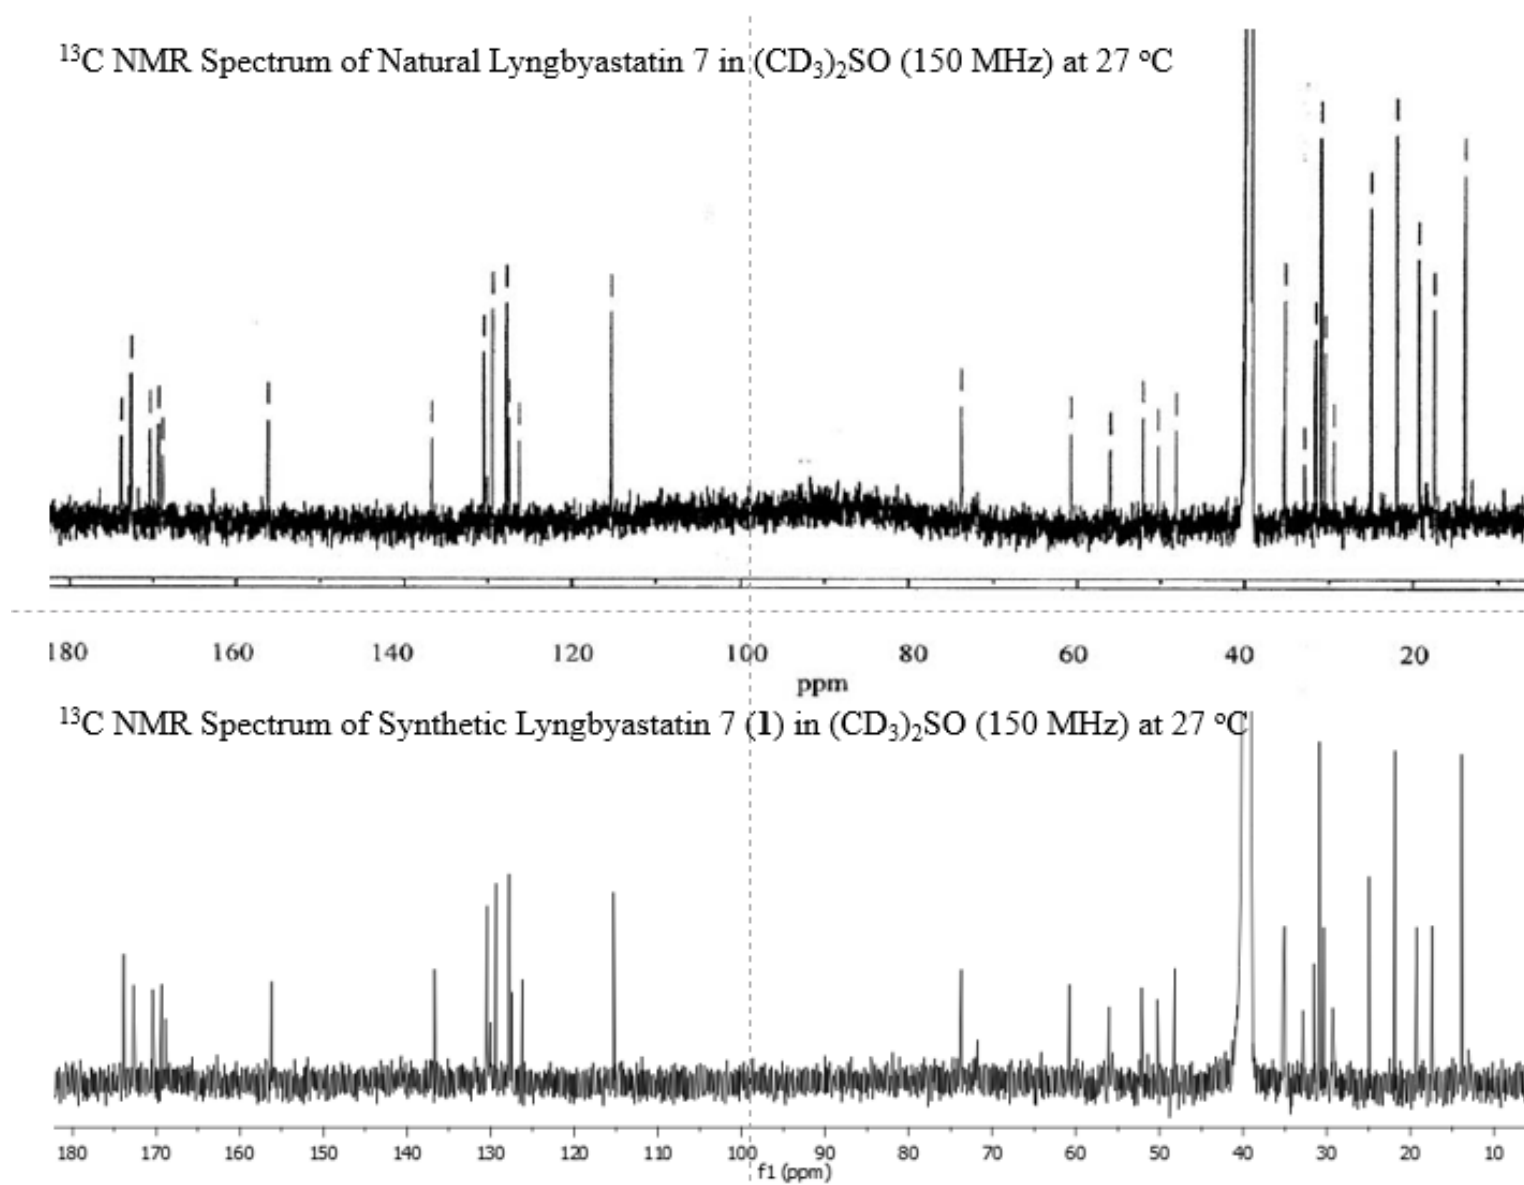

**Figure S3.** Comparison of  $^{13}\text{C}$  NMR spectrum of natural lyngbyastatin 7 and synthetic lyngbyastatin 7 (**1**).

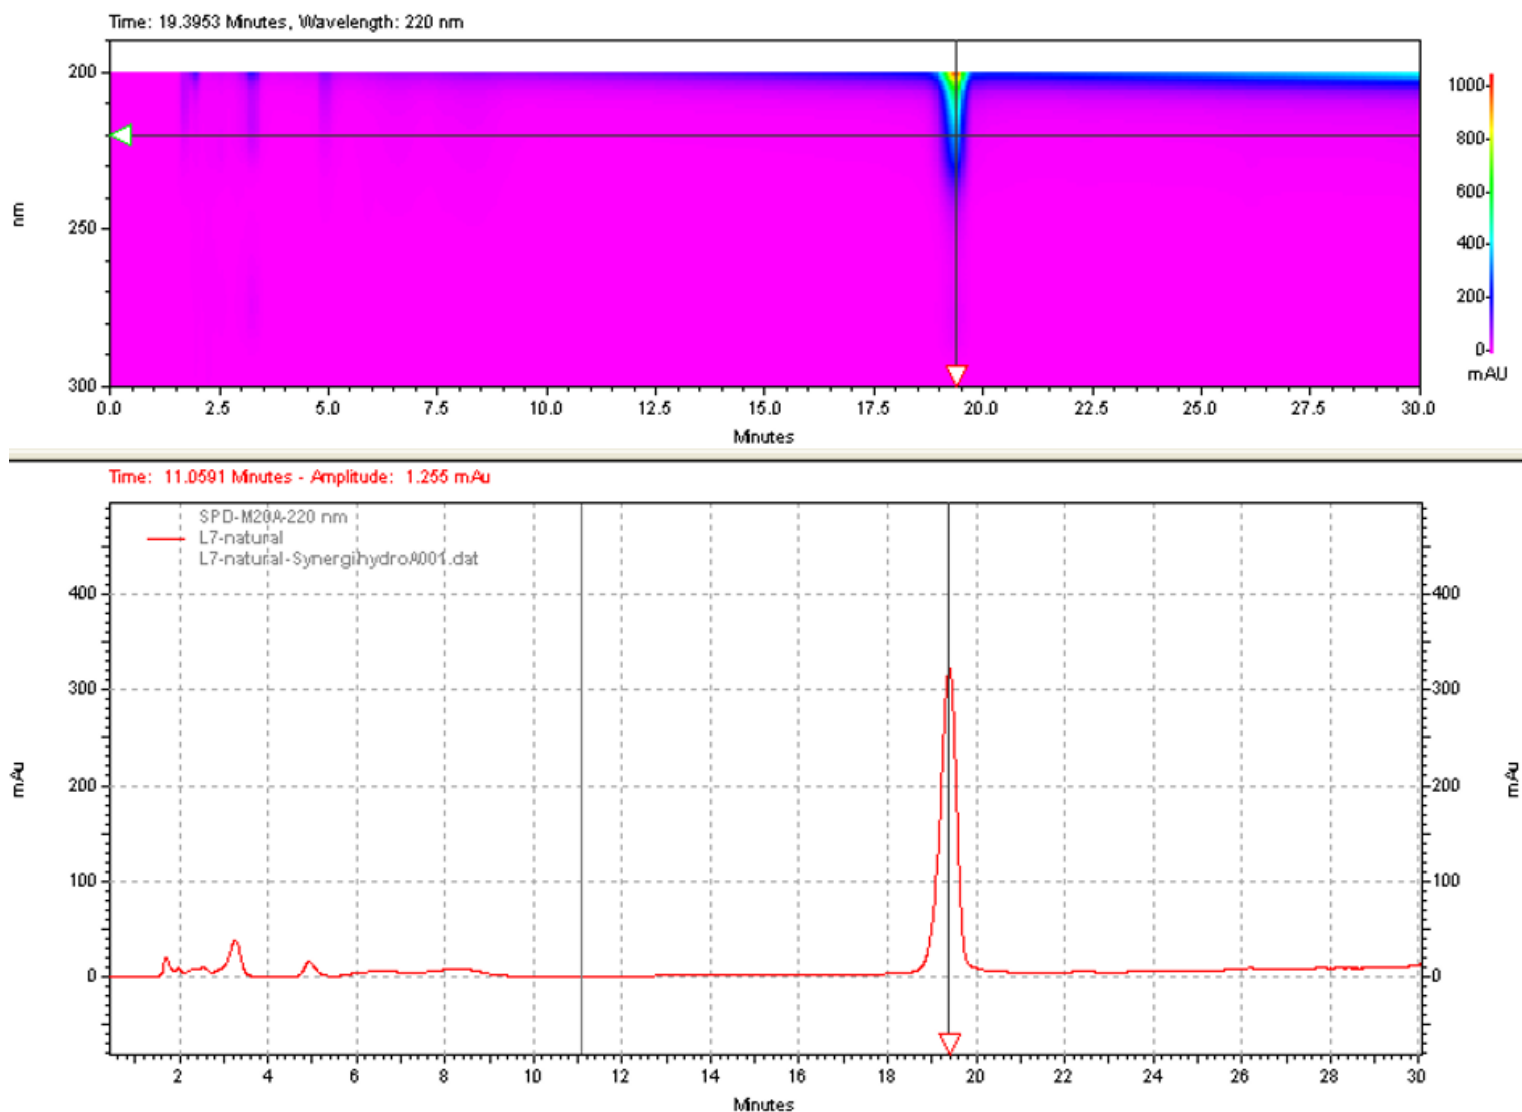

**Figure S4.** HPLC profile of natural lyngbyastatin 7 (column, Phenomenex Synergi 4  $\mu$  Hydro-RP 80  $\text{\AA}$  column 250  $\times$  4.68 mm, 4  $\mu\text{m}$ ; flow rate, 1.0 mL/min; elution method, H<sub>2</sub>O/MeOH=50/50–20/80 linear gradient (0.0–36.0 min), H<sub>2</sub>O/MeOH=0/100 isocratic (36.0–46.0 min)). Retention time = 19.40 min.

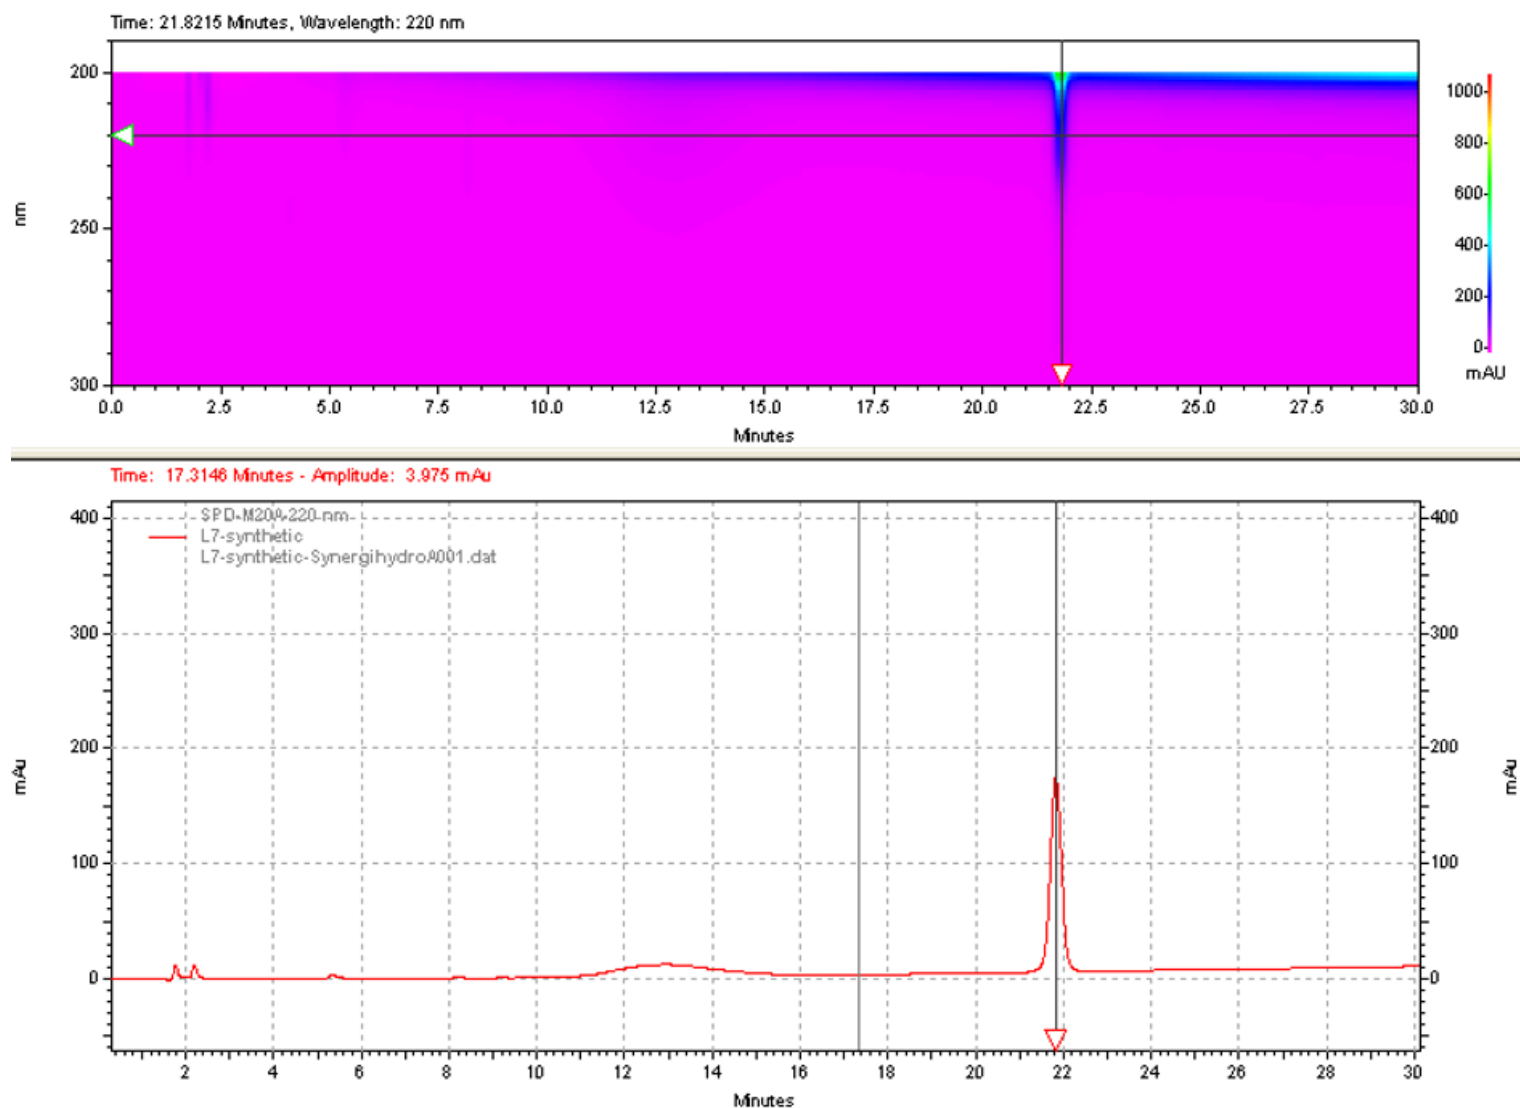

**Figure S5.** HPLC profile of synthetic lyngbyastatin 7 (**1**) (column, Phenomenex Synergi 4  $\mu$  Hydro-RP 80  $\text{\AA}$  column 250  $\times$  4.68 mm, 4  $\mu\text{m}$ ; flow rate, 1.0 mL/min; elution method, H<sub>2</sub>O/MeOH=50/50–20/80 linear gradient (0.0–36.0 min), H<sub>2</sub>O/MeOH=0/100 isocratic (36.0–46.0 min)). Retention time = 21.82 min.

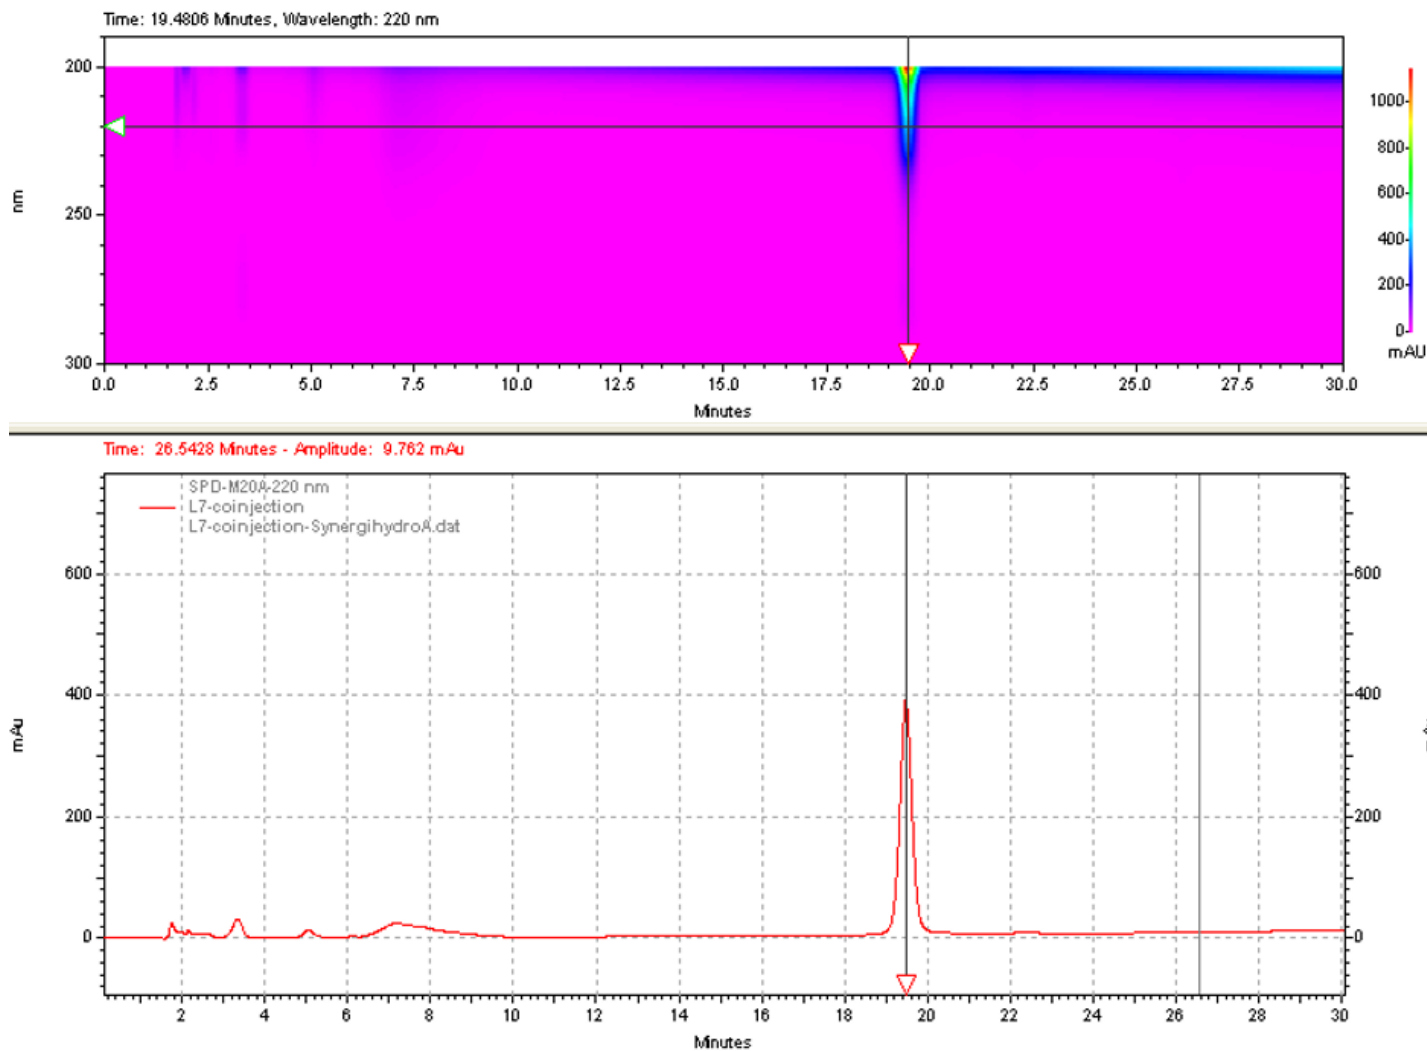

**Figure S6.** HPLC profile of coinjection of natural lyngbyastatin 7 and synthetic lyngbyastatin 7 (**1**) (column, Phenomenex Synergi 4  $\mu$  Hydro-RP 80  $\text{\AA}$  column 250  $\times$  4.68 mm, 4  $\mu\text{m}$ ; flow rate, 1.0 mL/min; elution method, H<sub>2</sub>O/MeOH=50/50–20/80 linear gradient (0.0–36.0 min), H<sub>2</sub>O/MeOH=0/100 isocratic (36.0–46.0 min)). Retention time = 19.48 min.

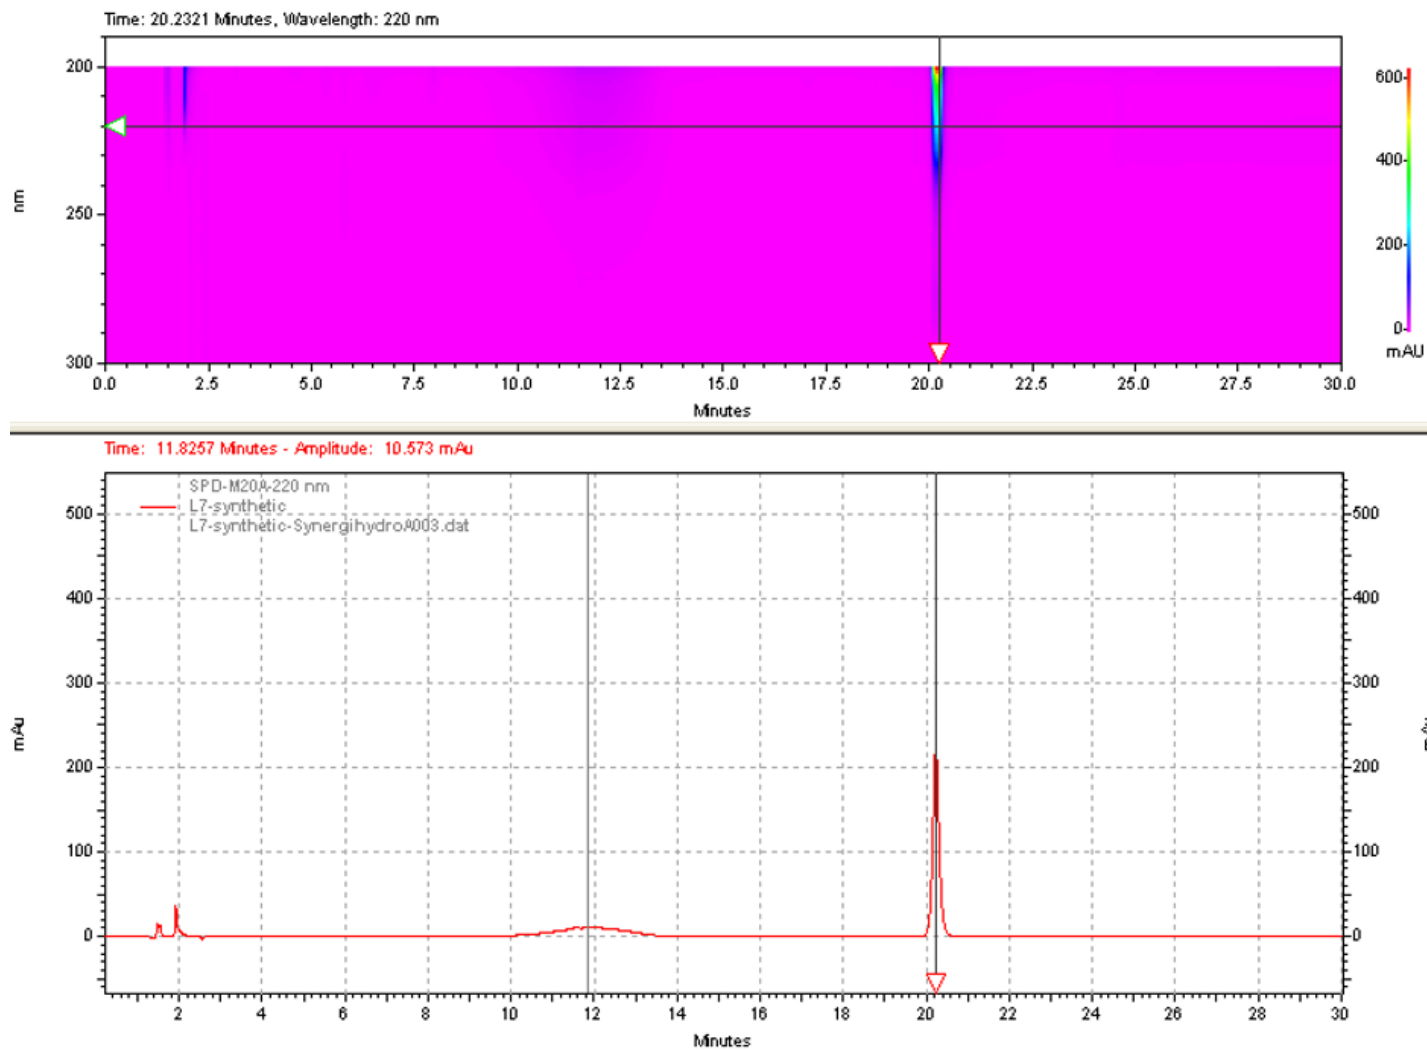

**Figure S7.** HPLC profile of synthetic lyngbyastatin 7 (**1**) (column, Phenomenex Synergi 4  $\mu$  Hydro-RP 80  $\text{\AA}$  column 250  $\times$  4.68 mm, 4  $\mu\text{m}$ ; flow rate, 1.0 mL/min; elution method, H<sub>2</sub>O/MeCN=80/20–50/50 linear gradient (0.0–30.0 min), H<sub>2</sub>O/MeCN=50/50–0/100 linear gradient (30.0–45.0 min), H<sub>2</sub>O/MeCN =0/100 isocratic (45.0–55.0 min)). Retention time = 20.21 min.



$^1\text{H}$  NMR Spectrum of **9** in  $\text{CDCl}_3$  (400 MHz) at 25 °C

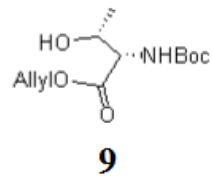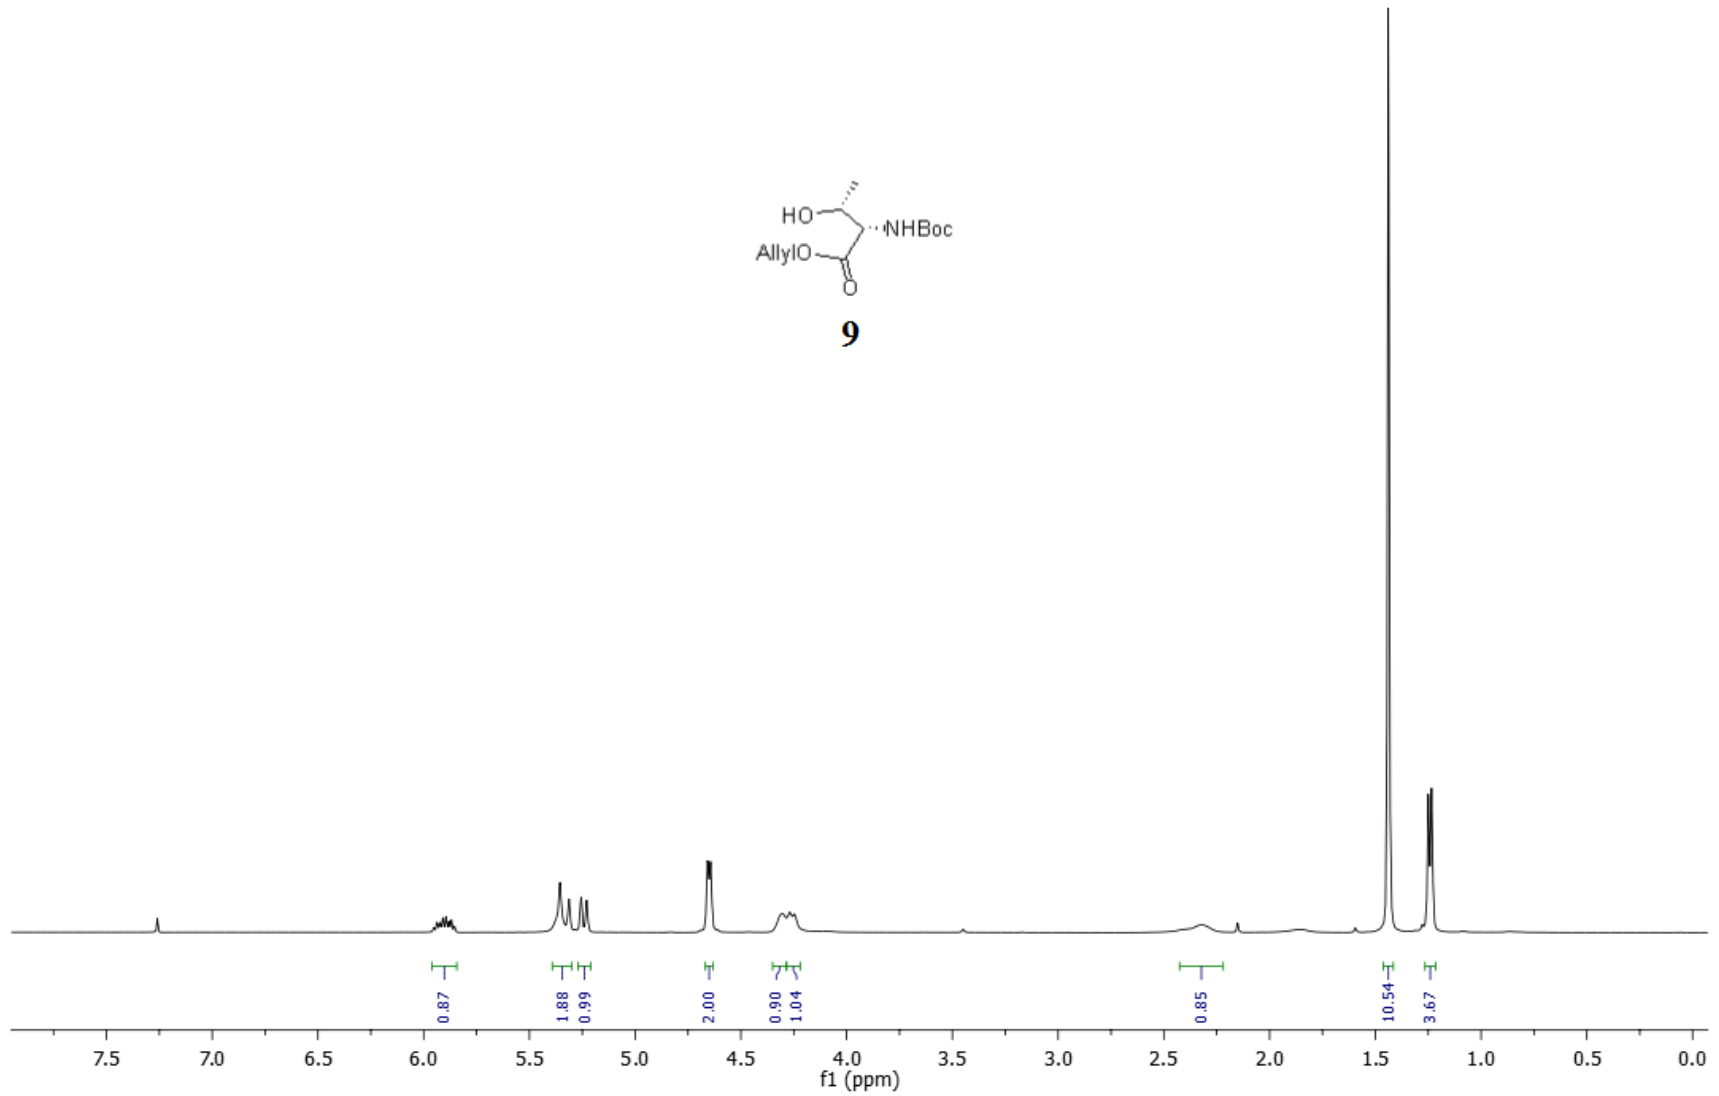

$^{13}\text{C}$  NMR Spectrum of **9** in  $\text{CDCl}_3$  (100 MHz) at 25 °C

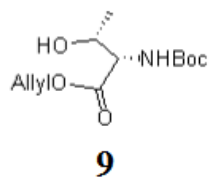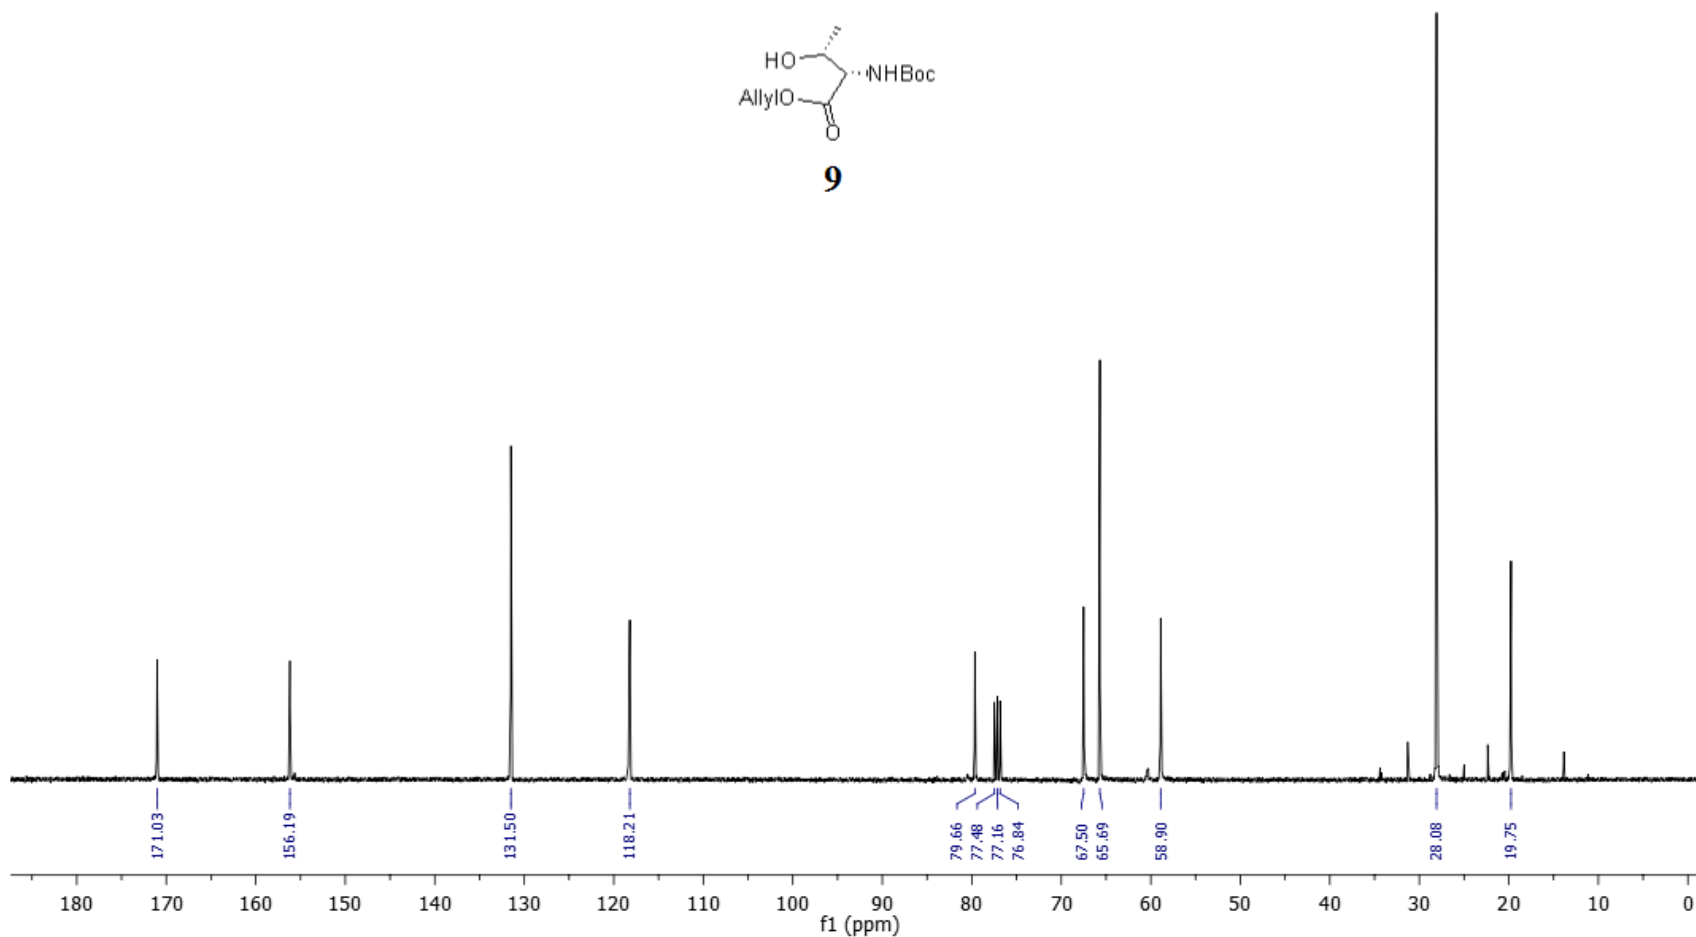

$^1\text{H}$  NMR Spectrum of **10** in  $\text{CDCl}_3$  (400 MHz) at 25 °C

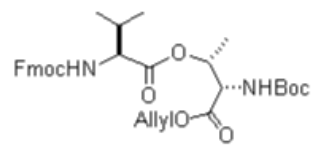

**10**

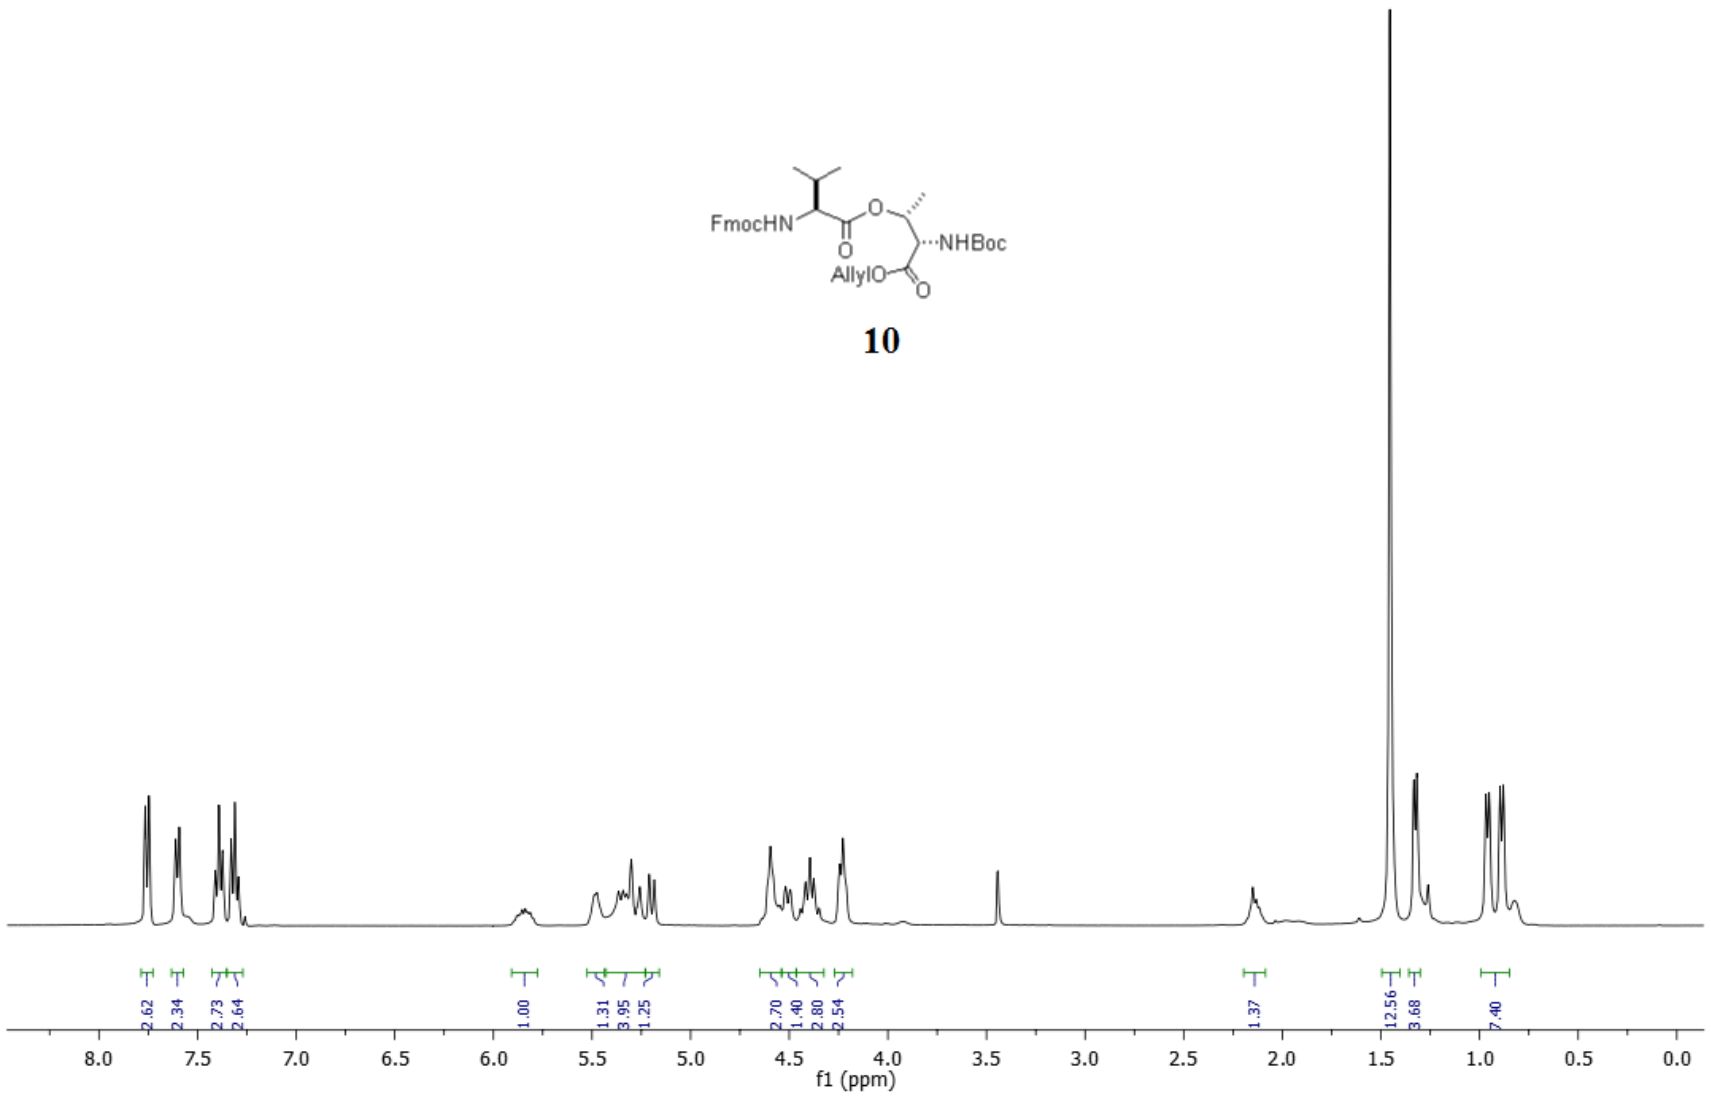

<sup>13</sup>C NMR Spectrum of **10** in CDCl<sub>3</sub> (100 MHz) at 25 °C

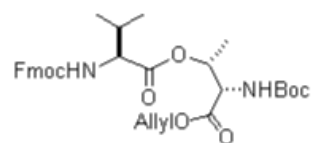

**10**

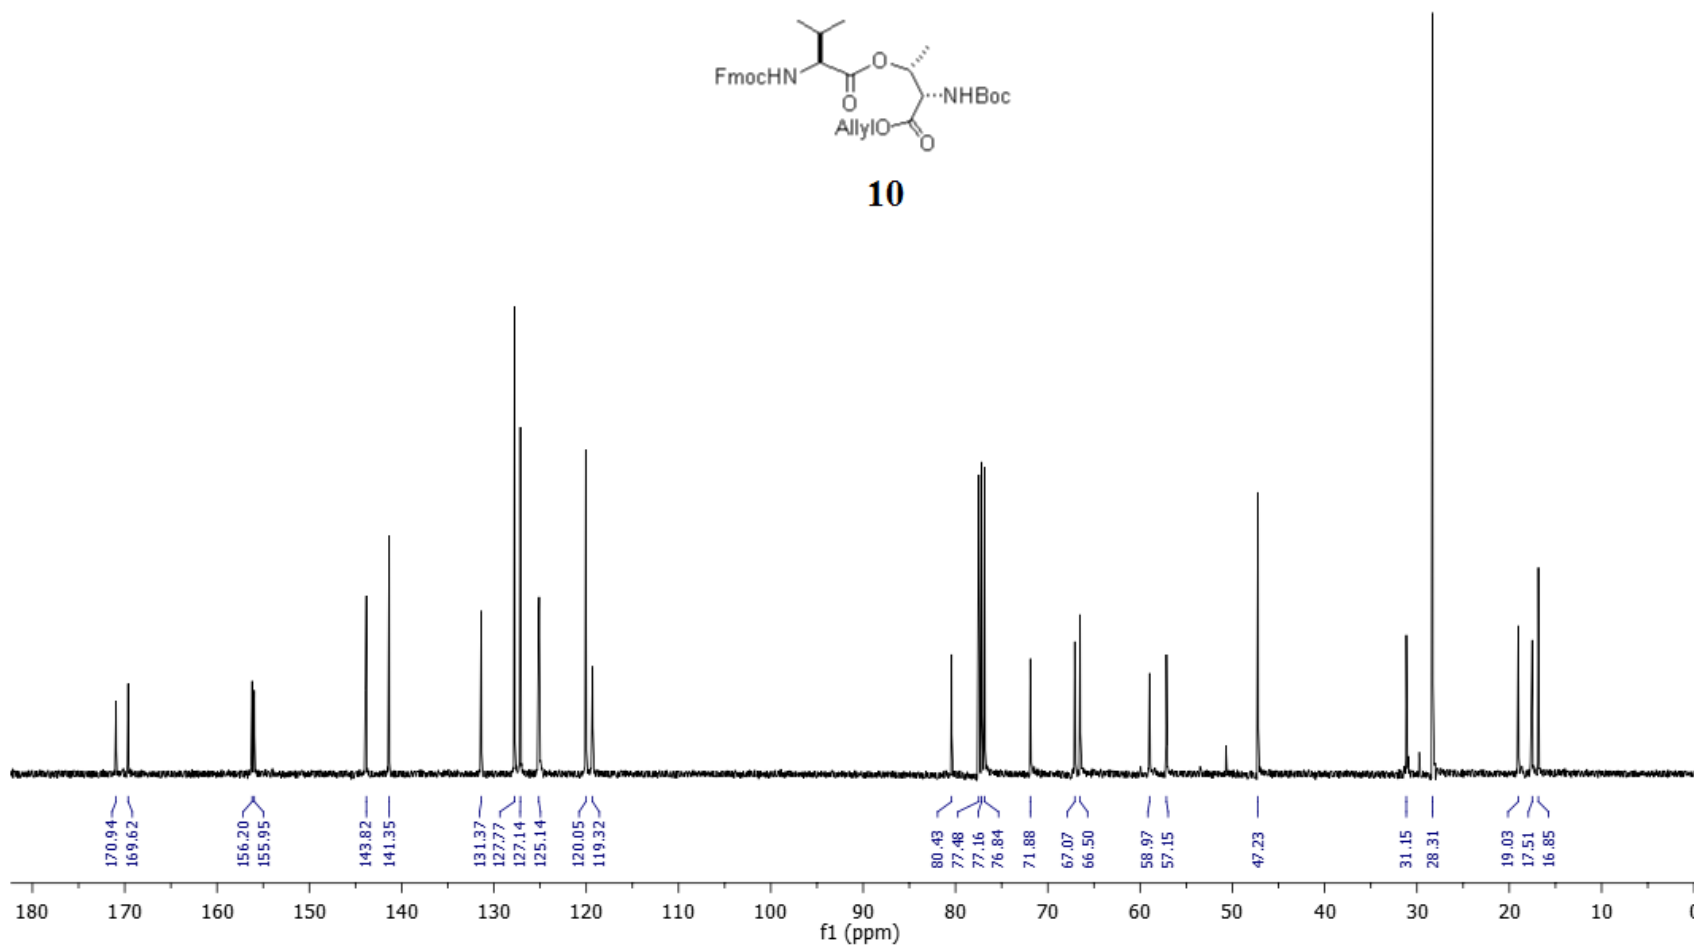

$^1\text{H}$  NMR Spectrum of **11** in  $\text{CDCl}_3$  (400 MHz) at 25 °C

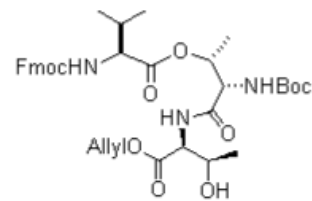

**11**

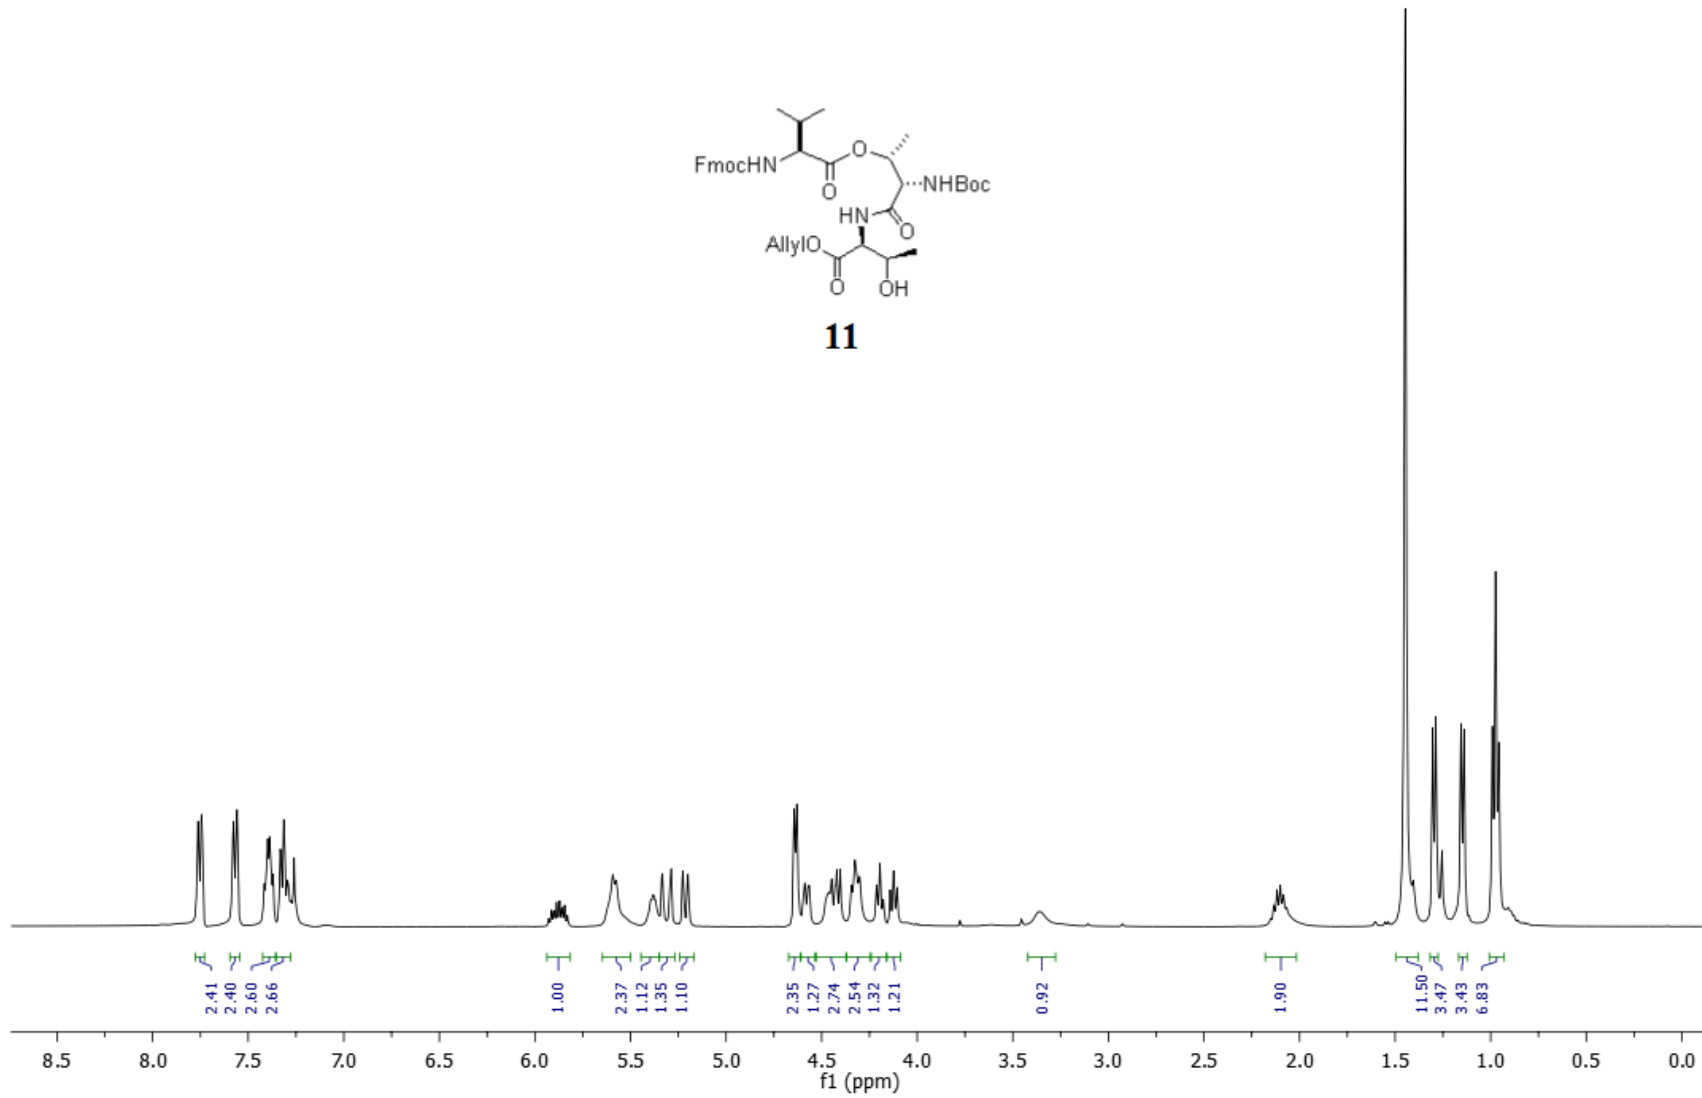

$^{13}\text{C}$  NMR Spectrum of **11** in  $\text{CDCl}_3$  (100 MHz) at 25 °C

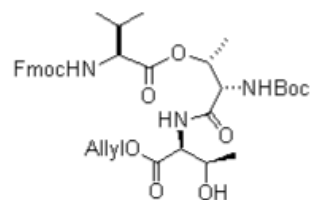

**11**

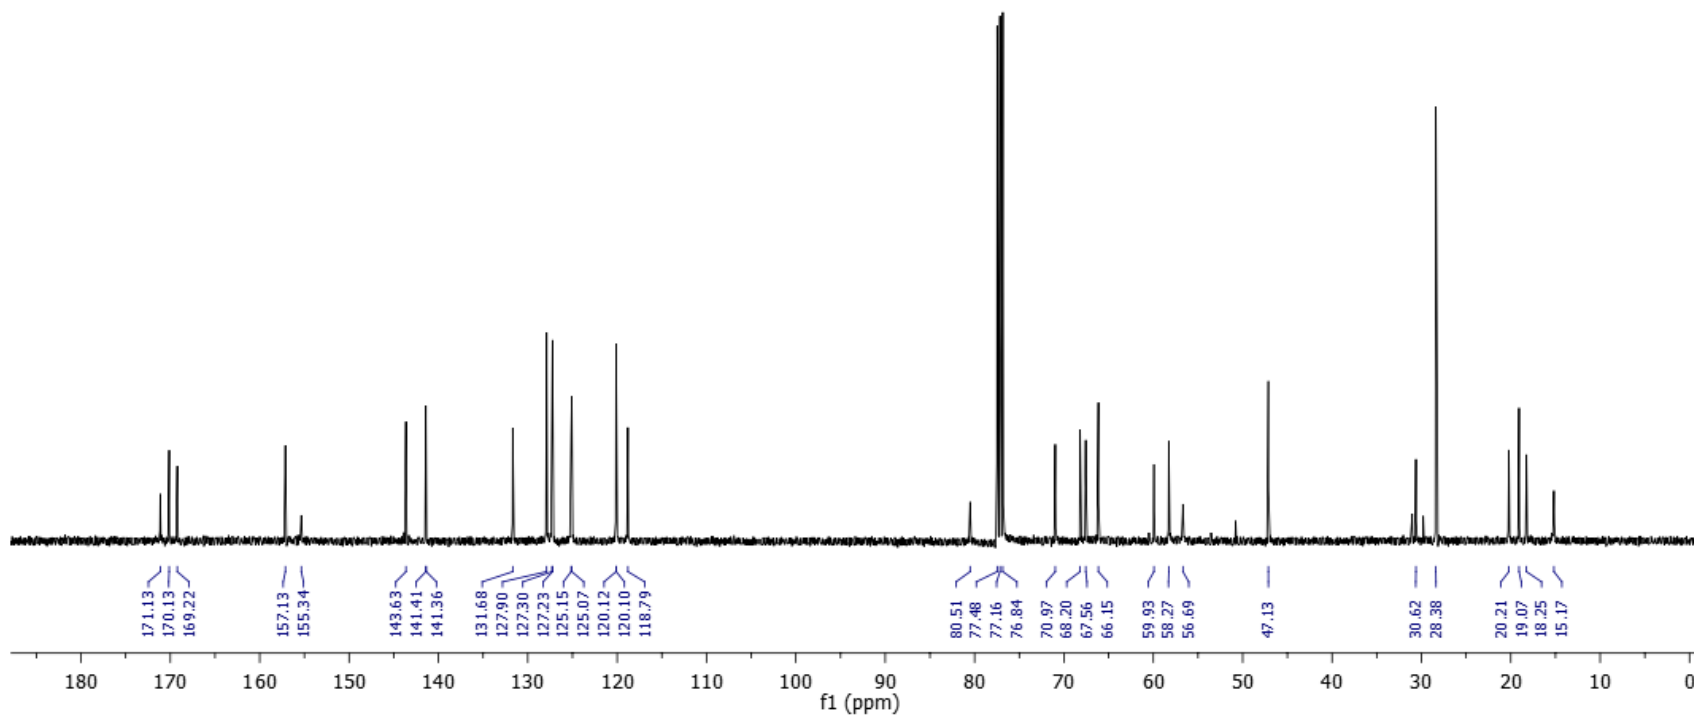

$^1\text{H}$  NMR Spectrum of **6** in  $\text{CDCl}_3$  (400 MHz) at 25 °C

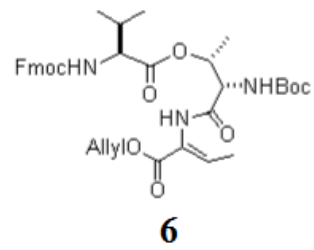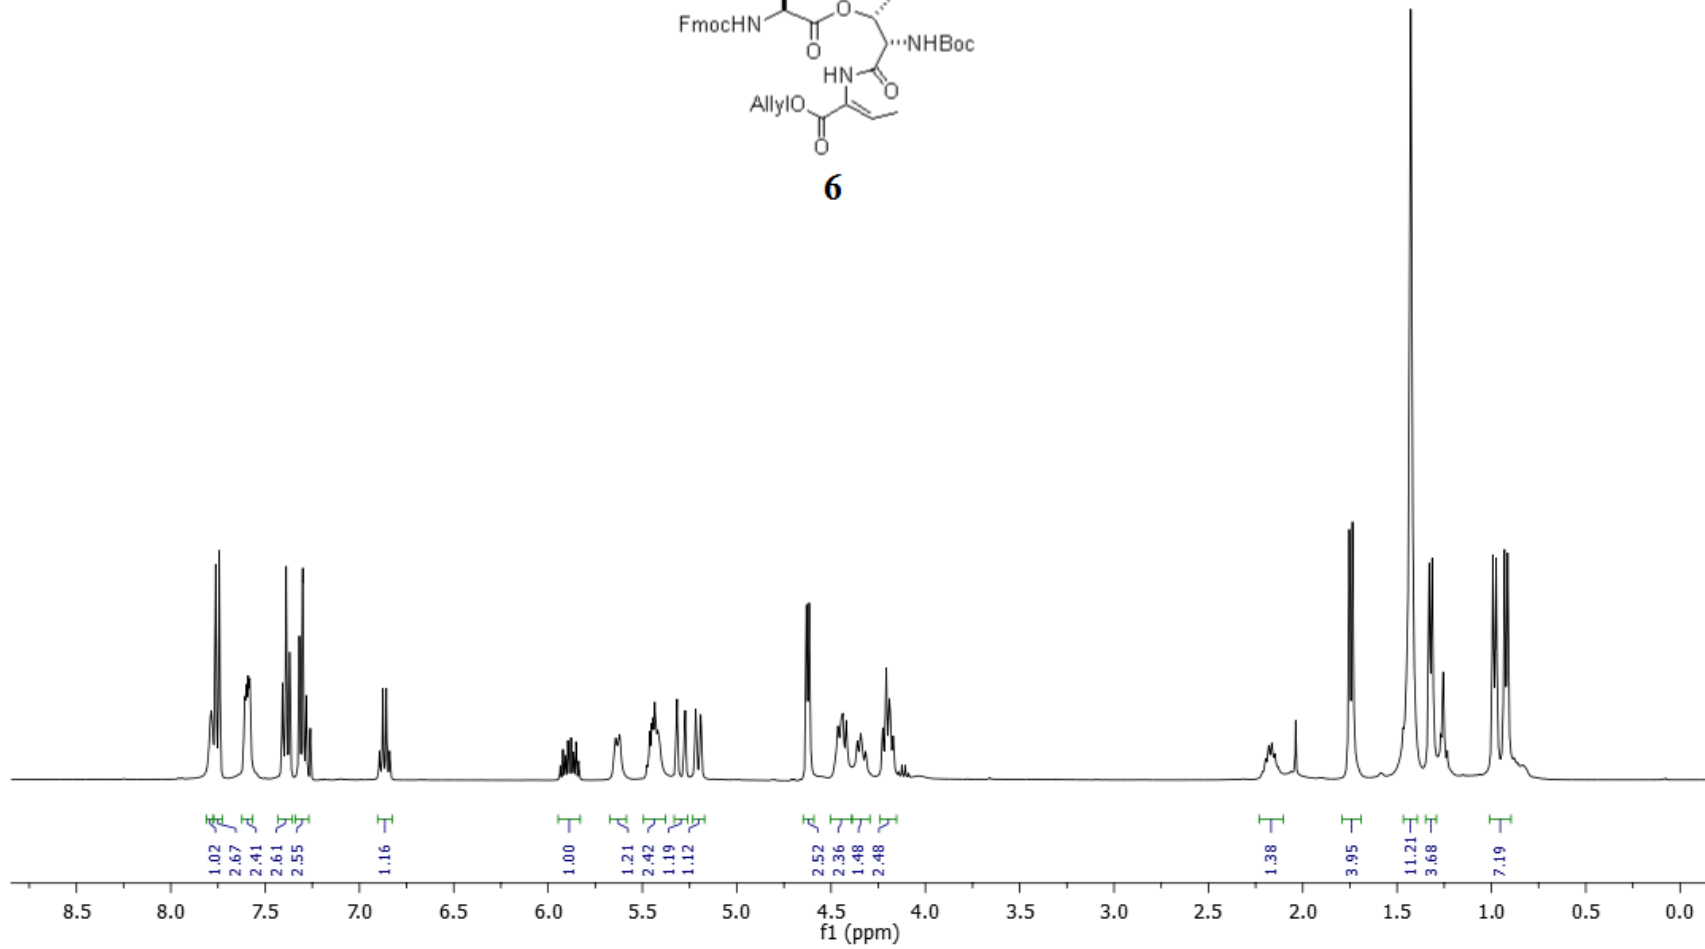

<sup>13</sup>C NMR Spectrum of **6** in CDCl<sub>3</sub> (100 MHz) at 25 °C

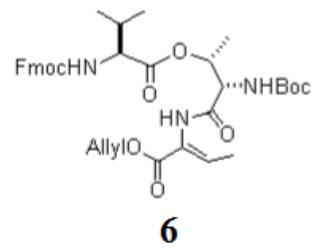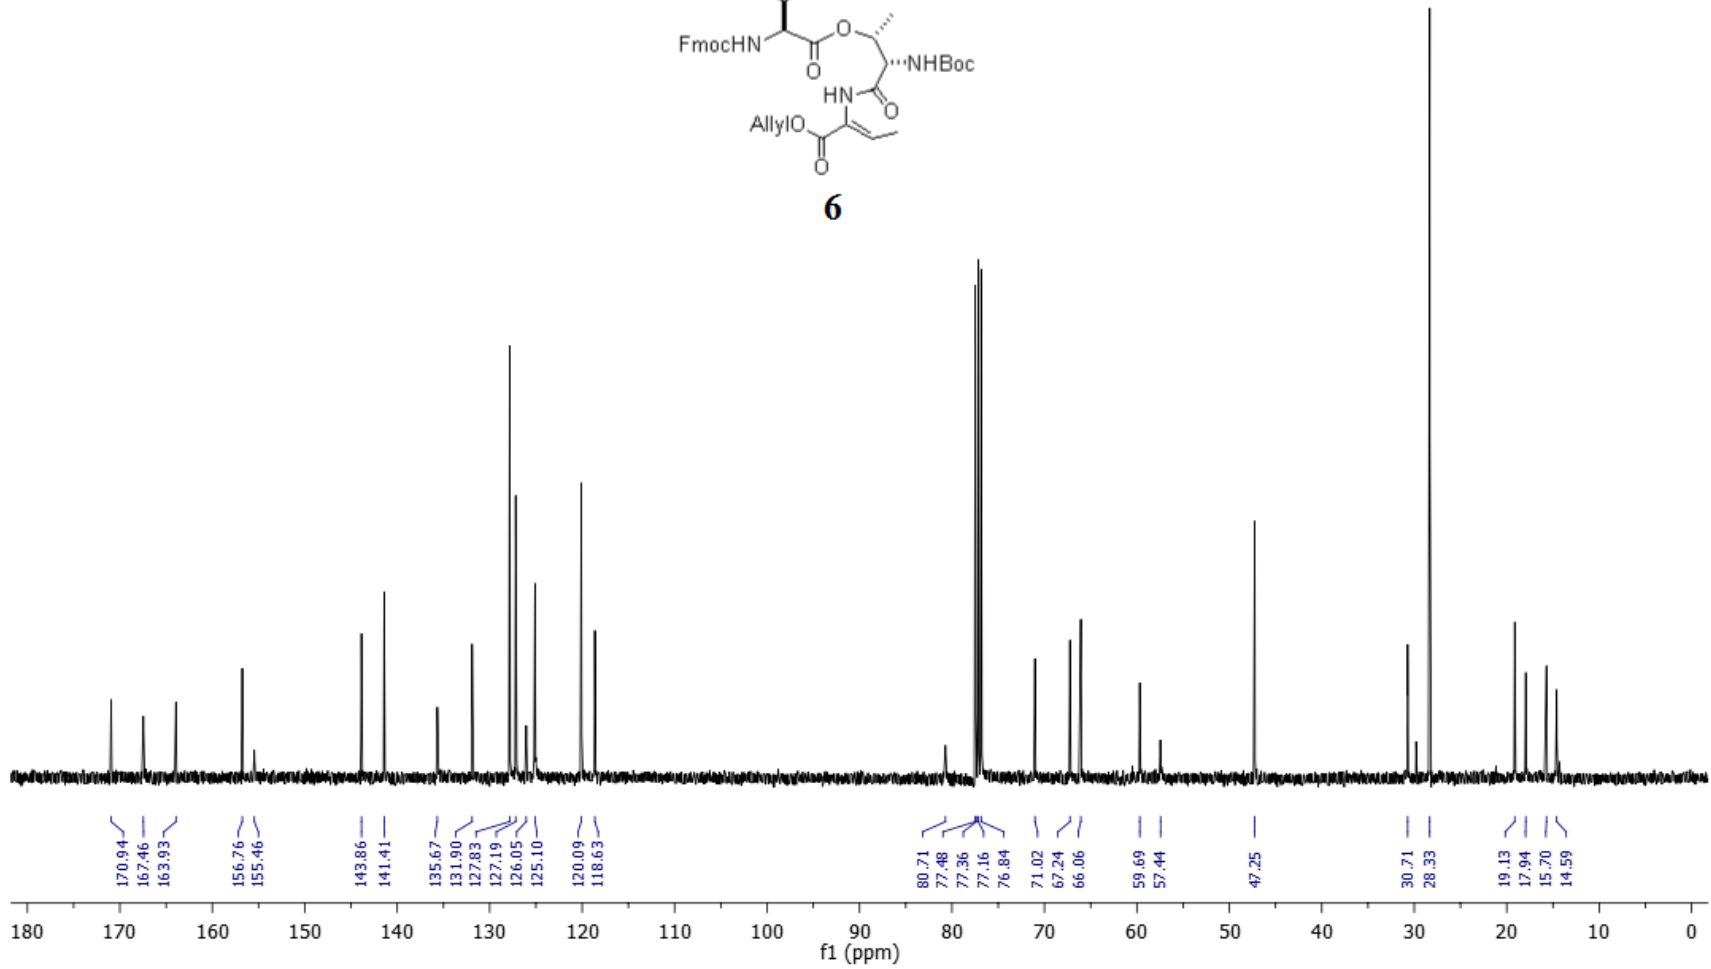



$^1\text{H}$  NMR Spectrum of **12** in  $\text{CDCl}_3$  (400 MHz) at 25 °C

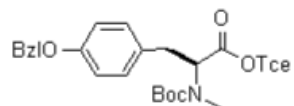

**12**

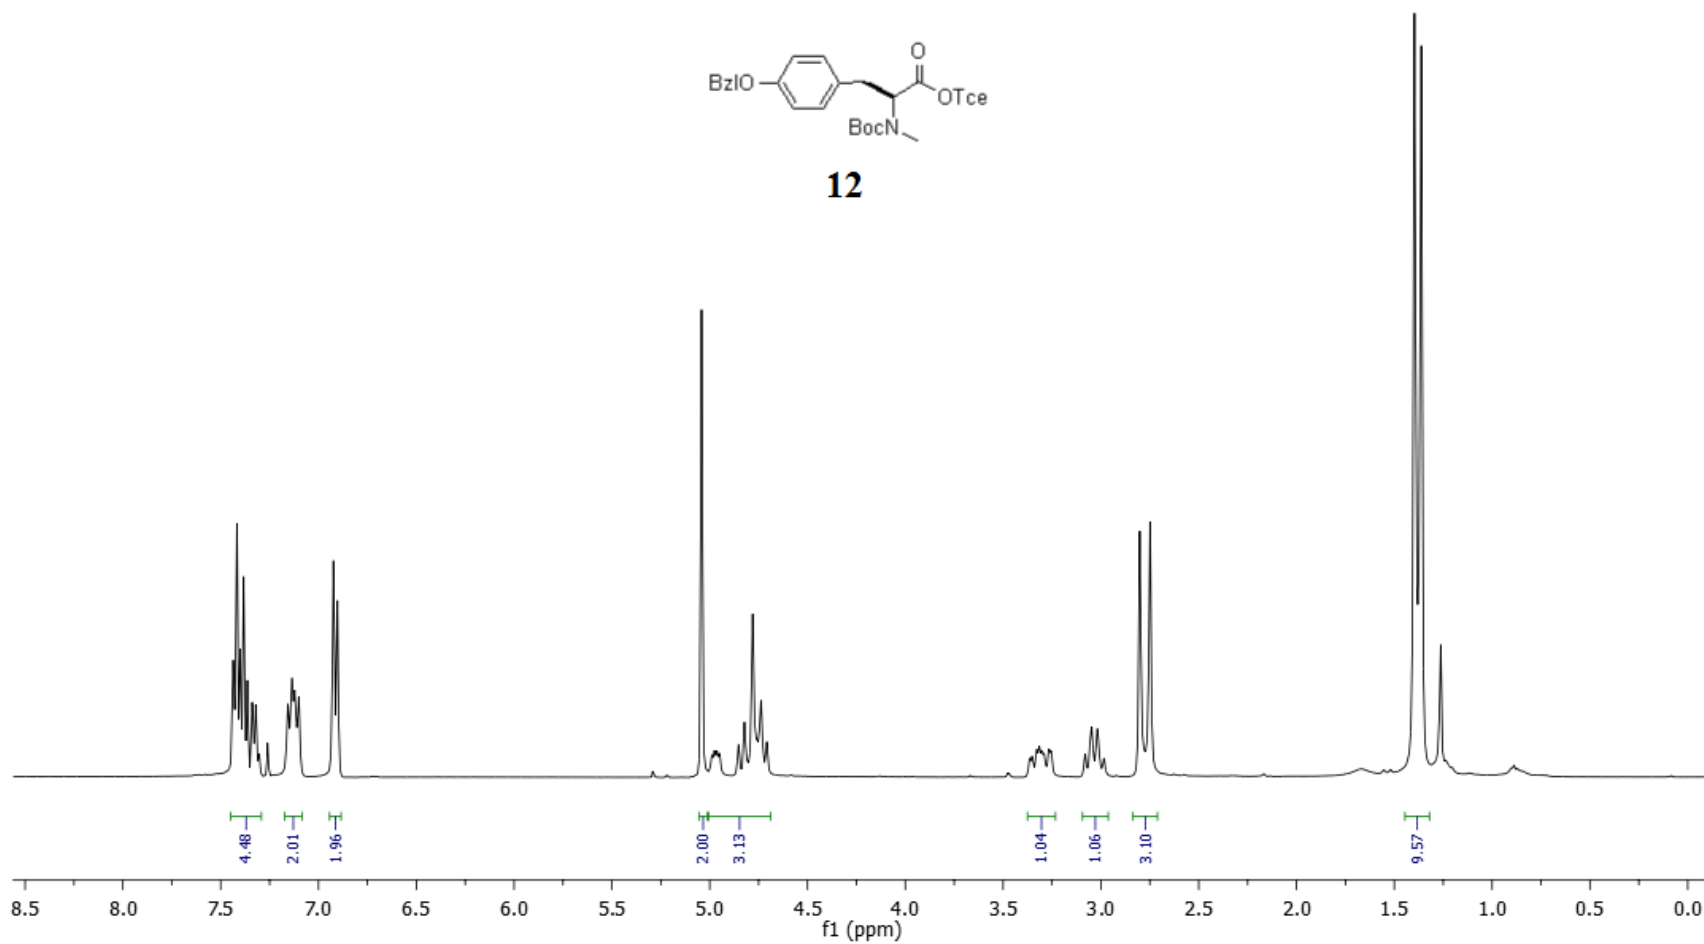

$^{13}\text{C}$  NMR Spectrum of **12** in  $\text{CDCl}_3$  (100 MHz) at 25 °C

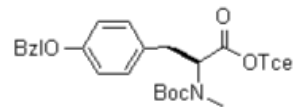

**12**

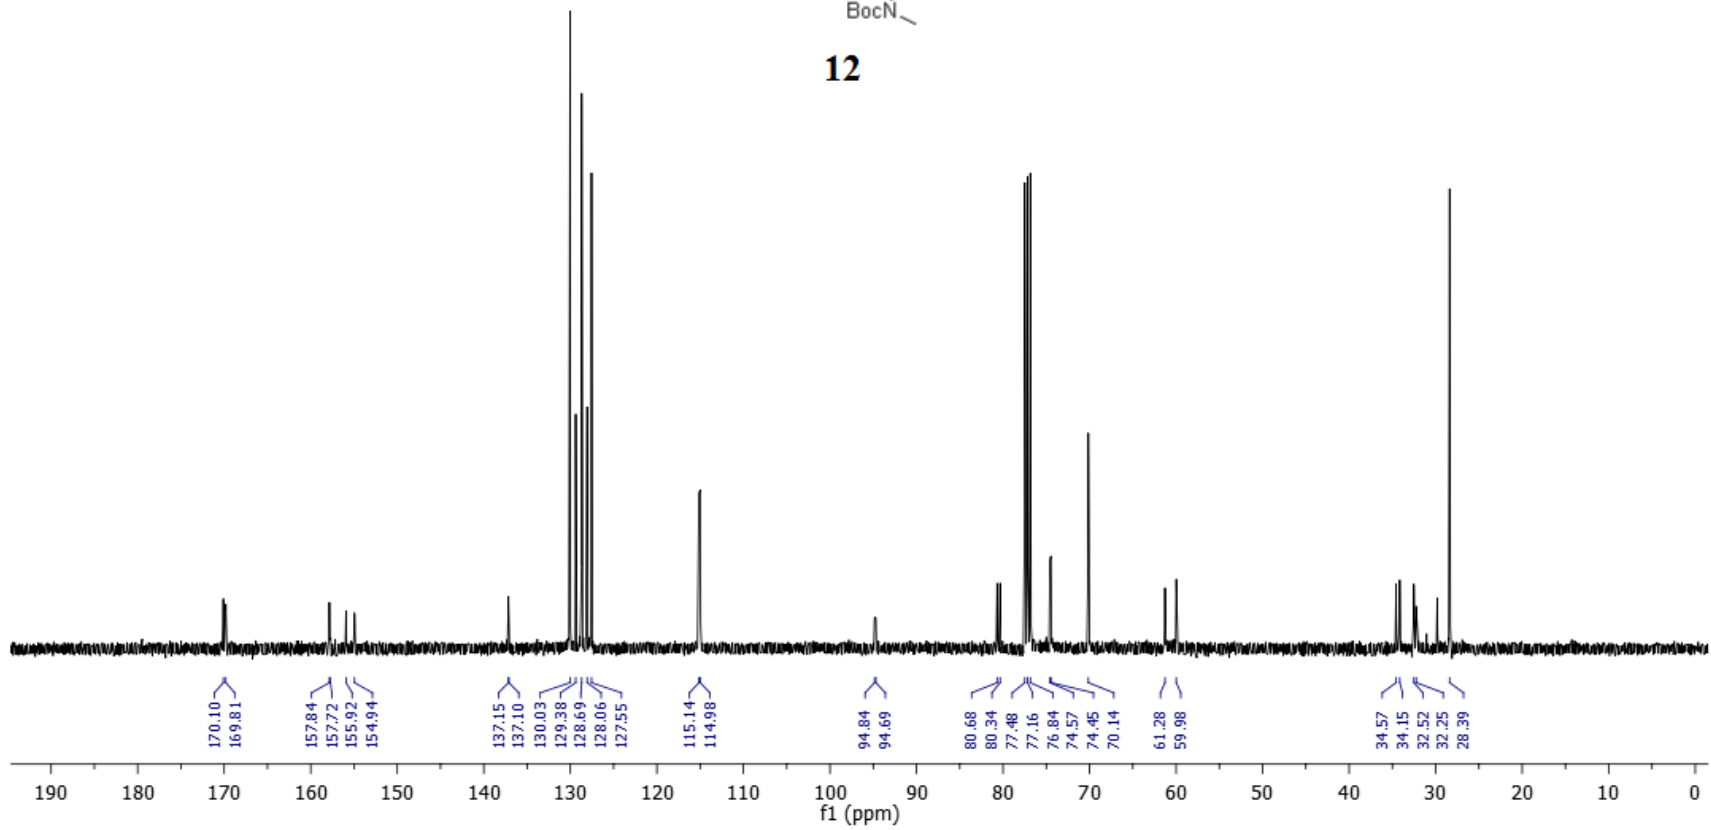

$^1\text{H}$  NMR Spectrum of **13** in  $\text{CDCl}_3$  (400 MHz) at 25 °C

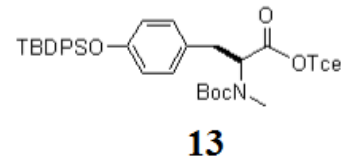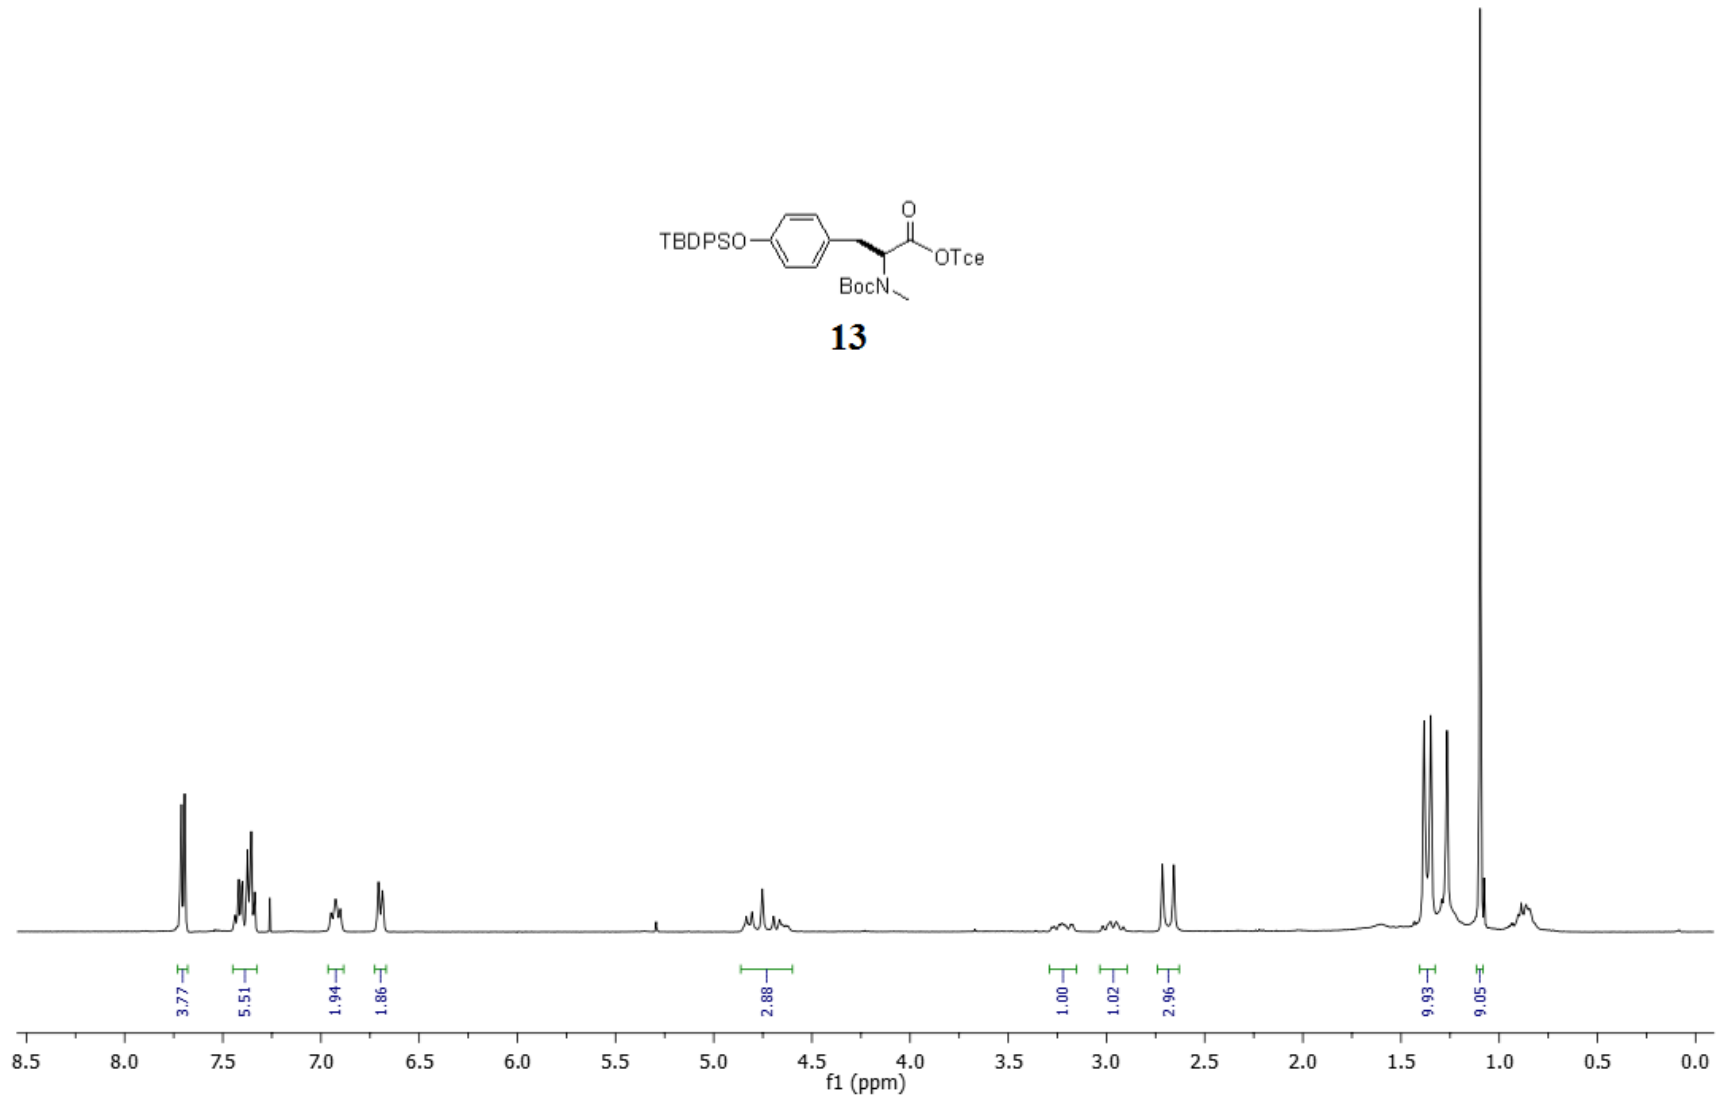

$^{13}\text{C}$  NMR Spectrum of **13** in  $\text{CDCl}_3$  (100 MHz) at 25 °C

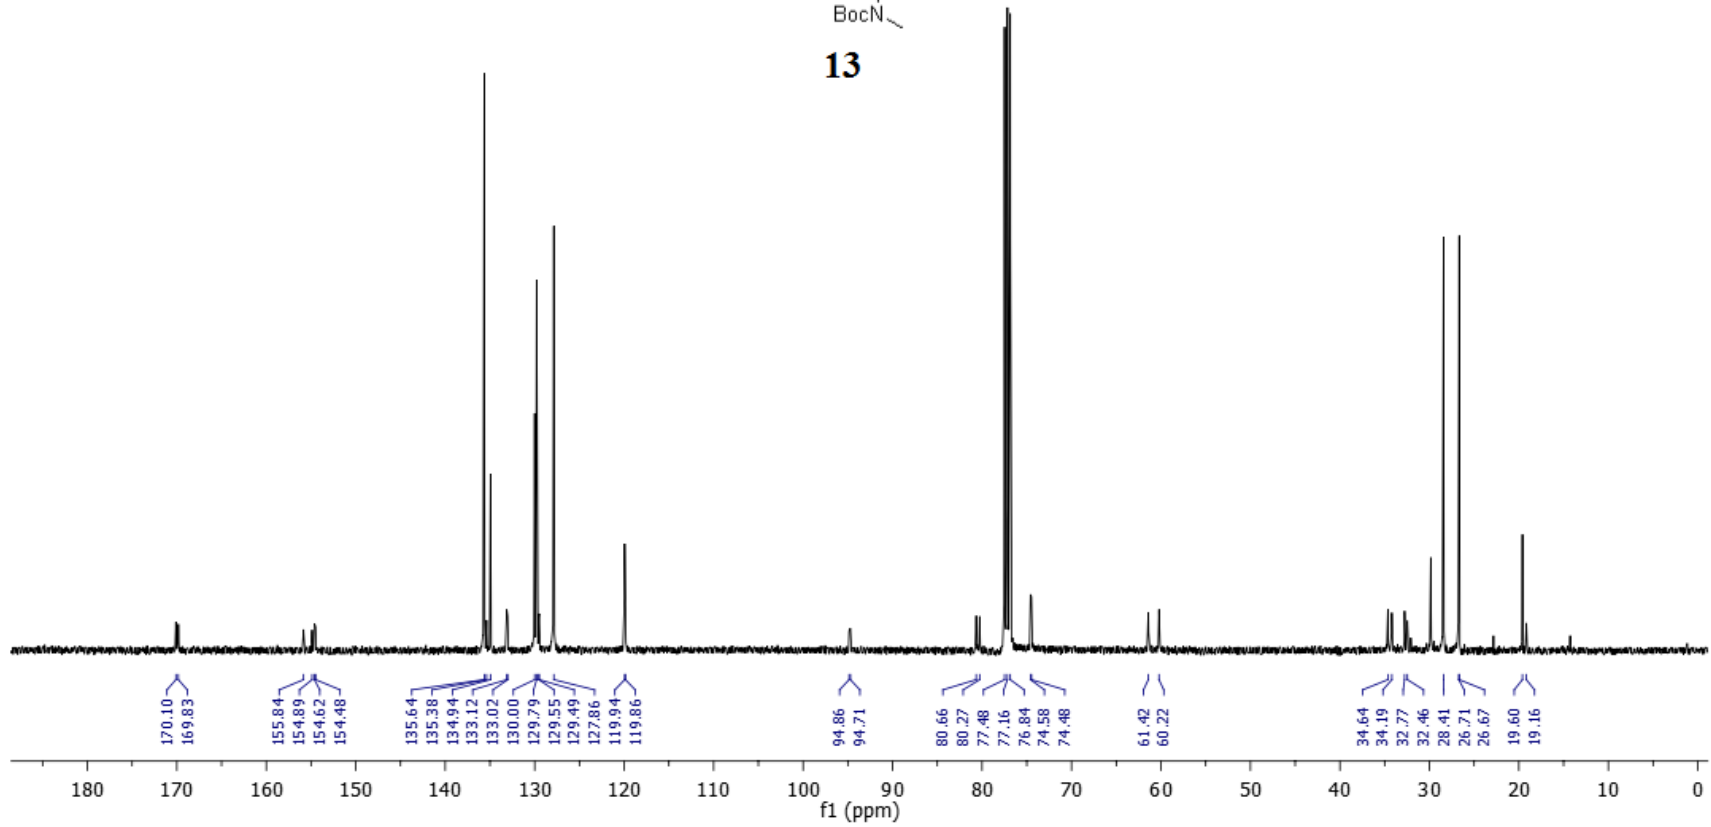

$^1\text{H}$  NMR Spectrum of **7** in  $\text{CDCl}_3$  (400 MHz) at 25 °C

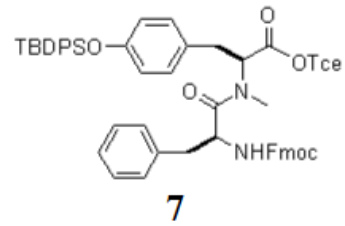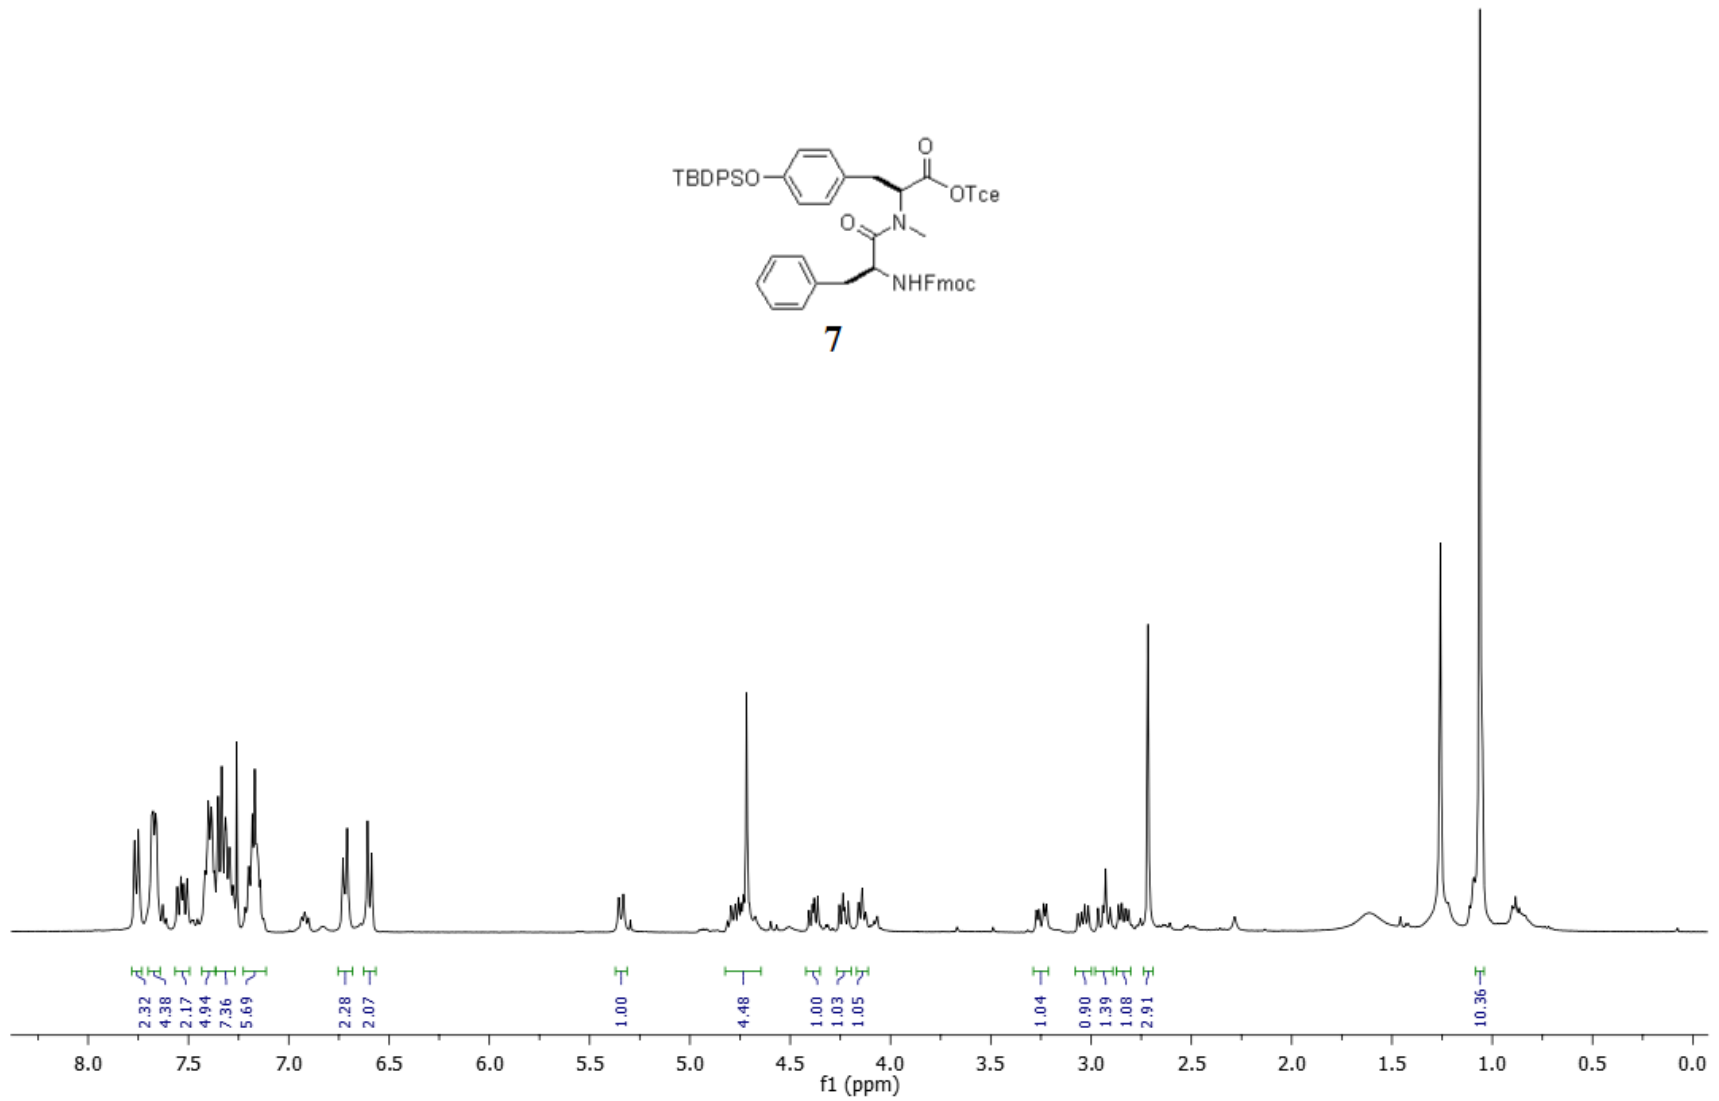

$^{13}\text{C}$  NMR Spectrum of **7** in  $\text{CDCl}_3$  (100 MHz) at 25 °C

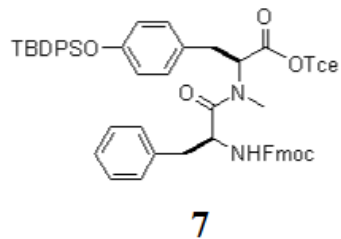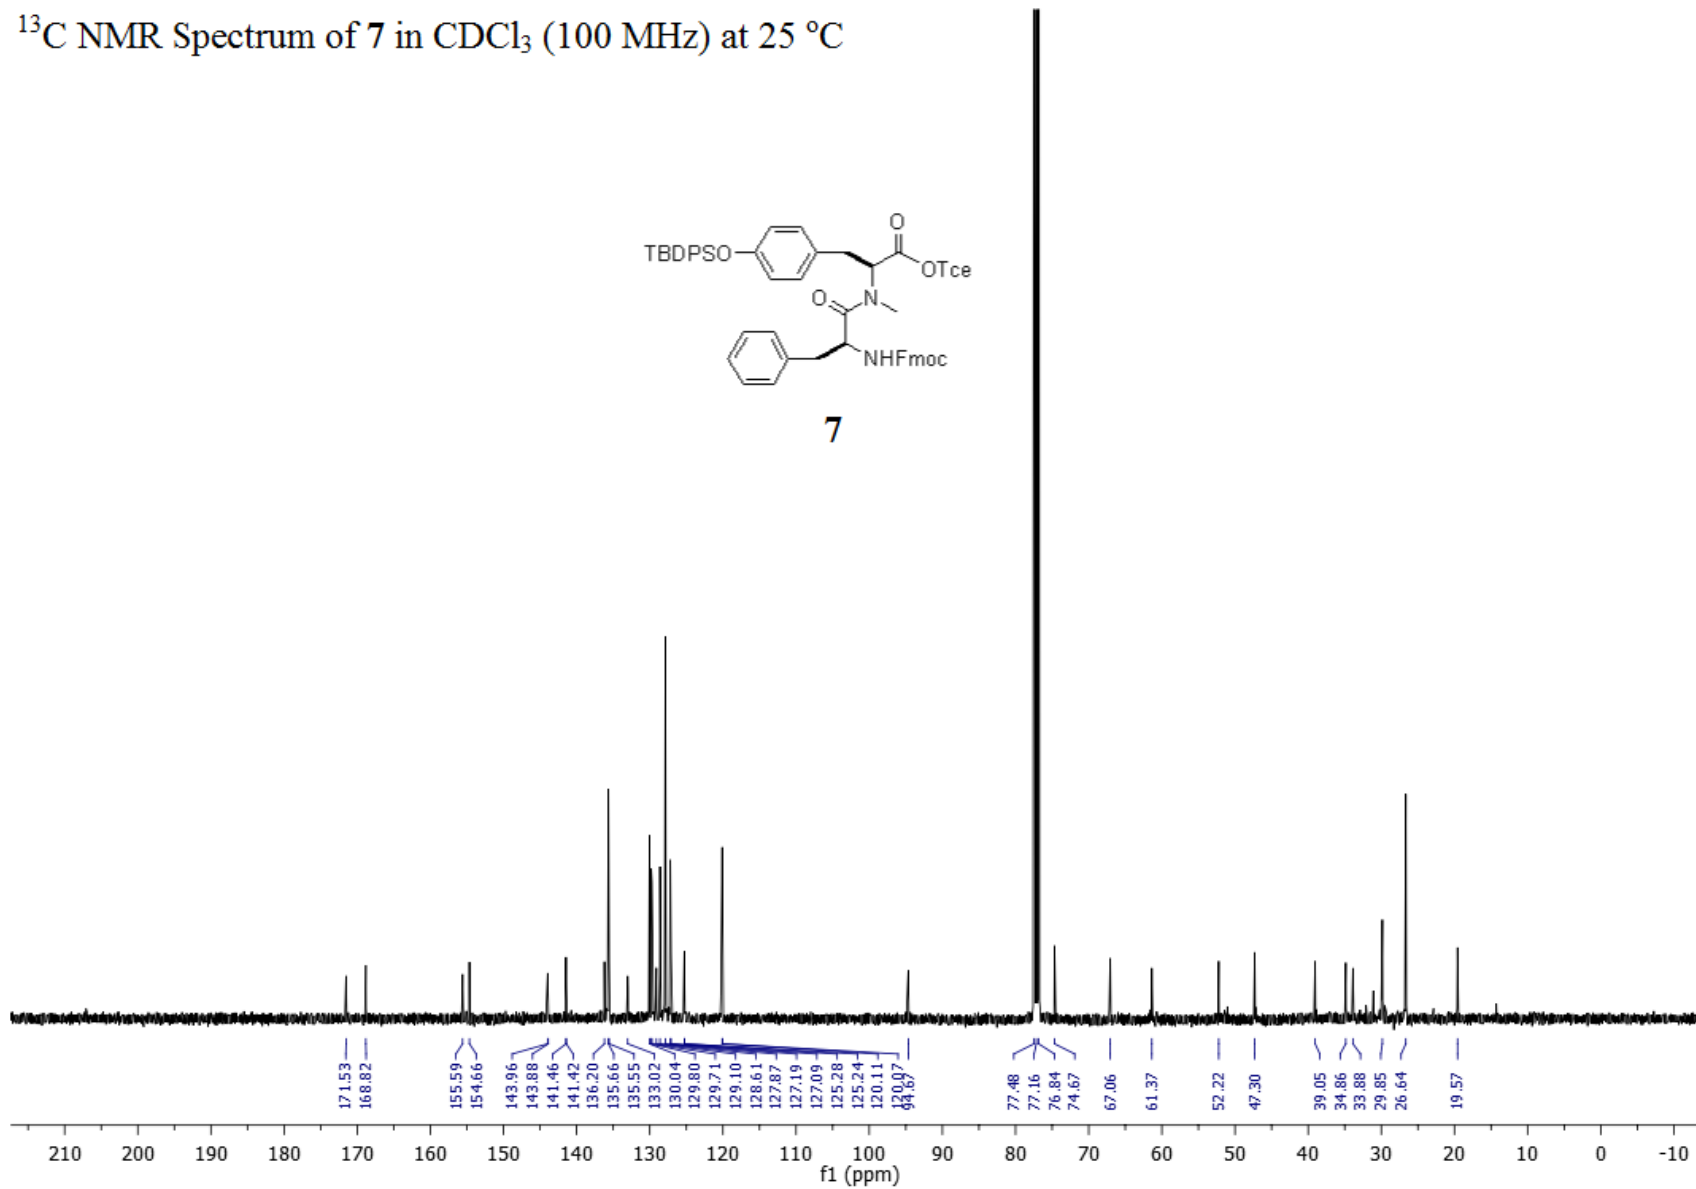

$^1\text{H}$  NMR Spectrum of **14** in  $\text{CDCl}_3$  (400 MHz) at 25 °C

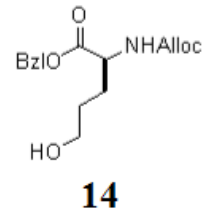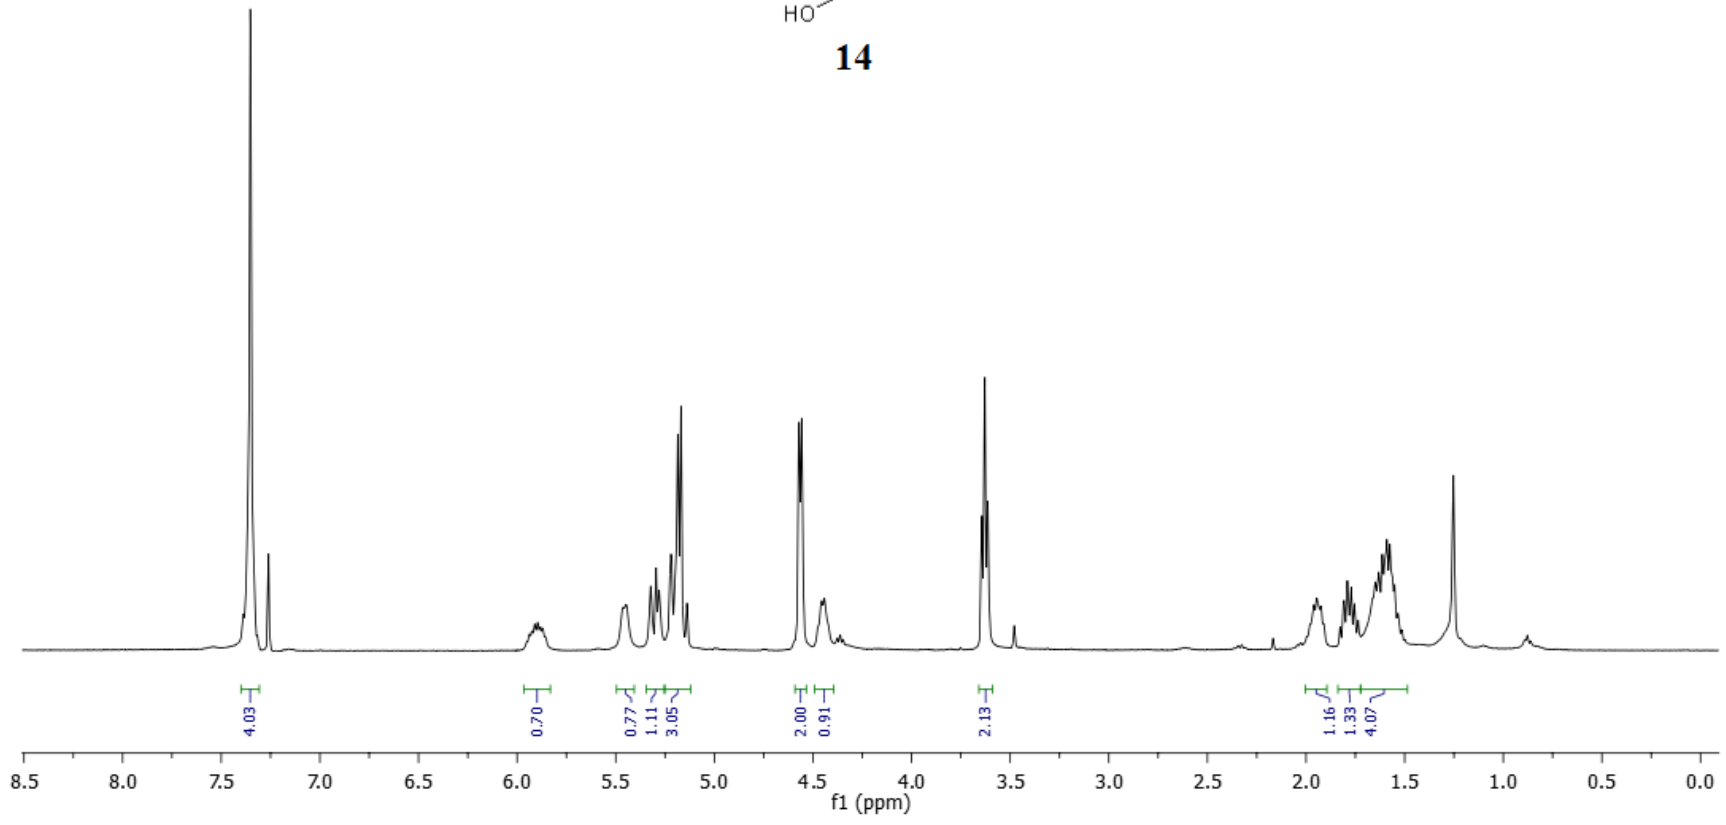

$^{13}\text{C}$  NMR Spectrum of **14** in  $\text{CDCl}_3$  (100 MHz) at 25 °C

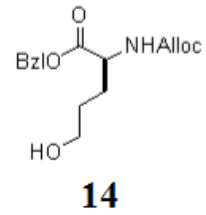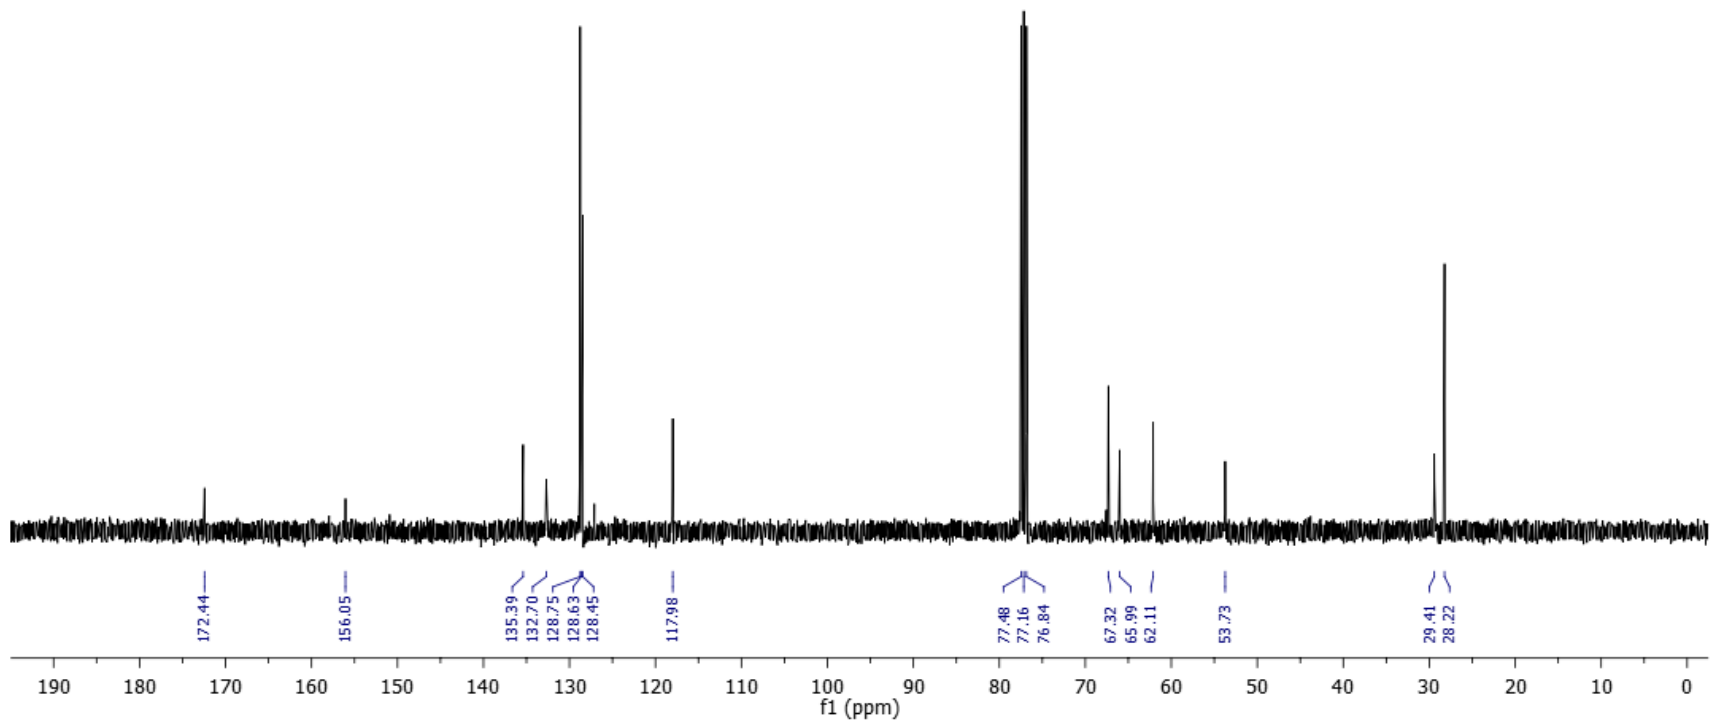



<sup>1</sup>H NMR Spectrum of **8** in CDCl<sub>3</sub> (400 MHz) at 25 °C

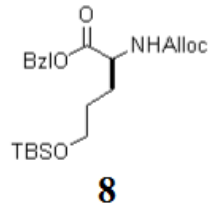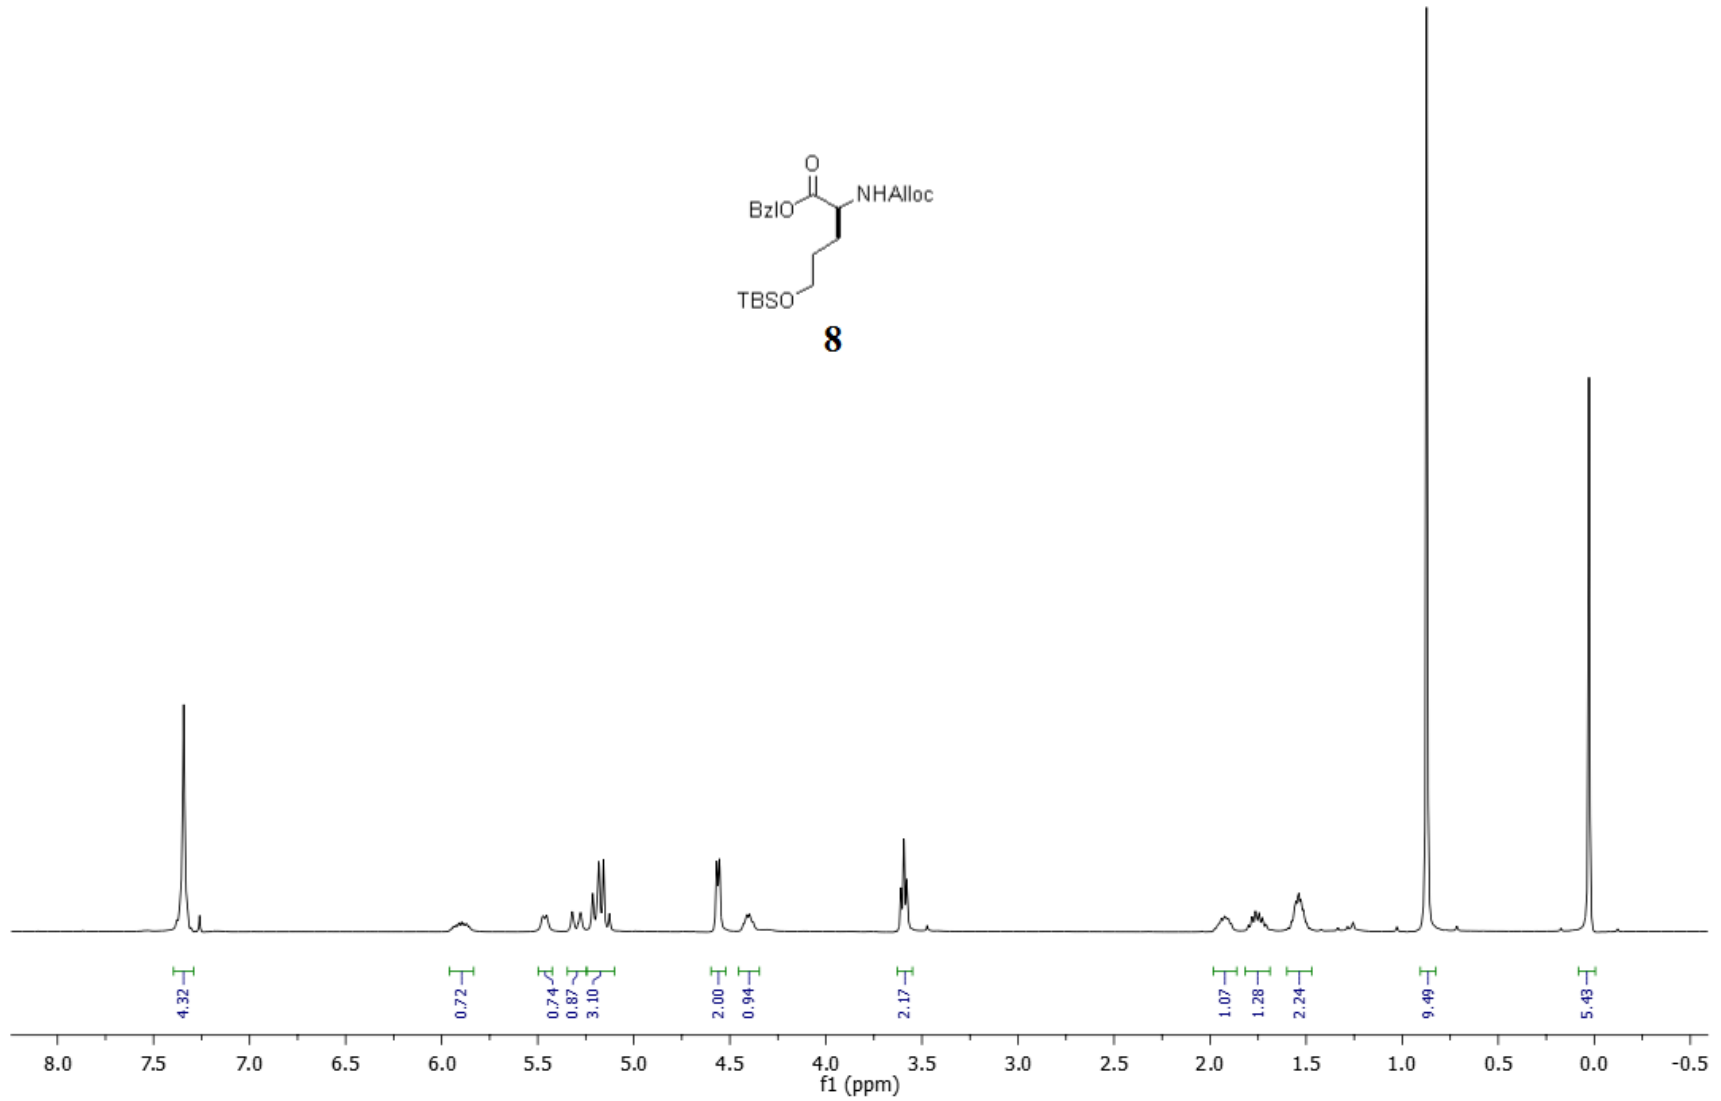

$^{13}\text{C}$  NMR Spectrum of **8** in  $\text{CDCl}_3$  (100 MHz) at 25 °C

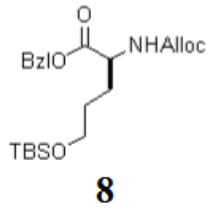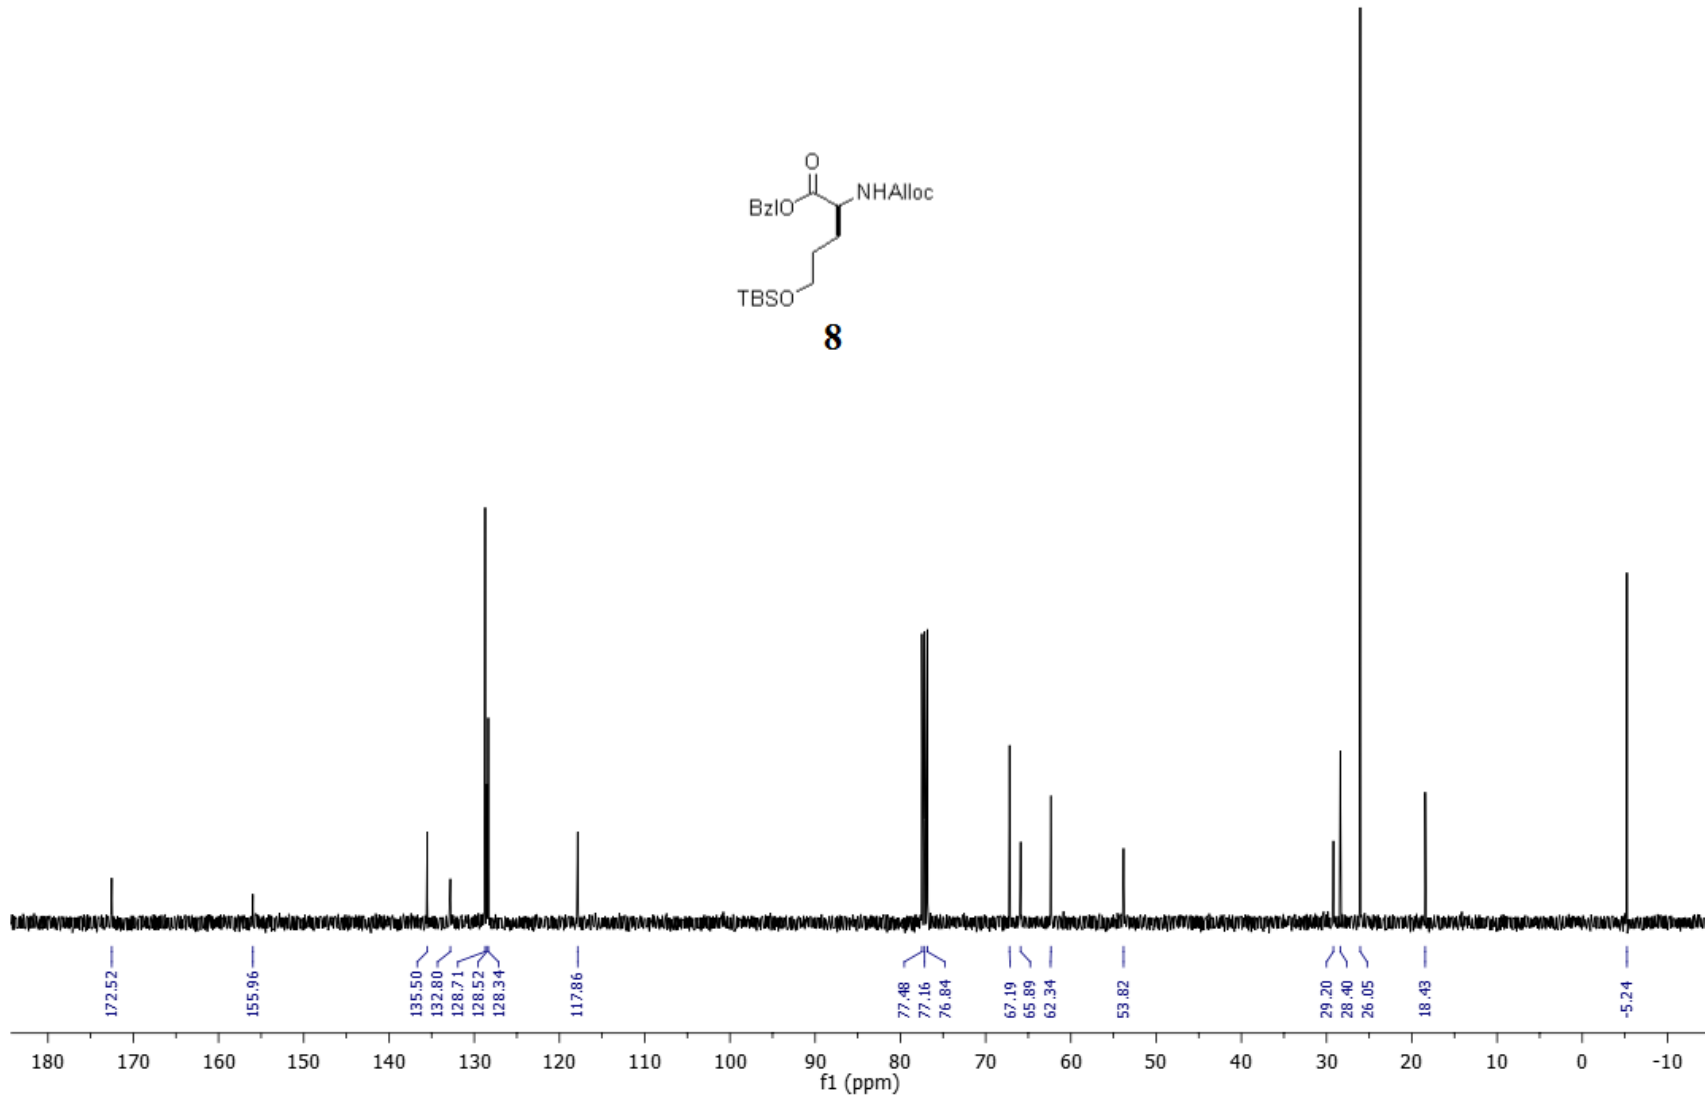

$^1\text{H}$  NMR Spectrum of **15** in  $\text{CDCl}_3$  (400 MHz) at 25 °C

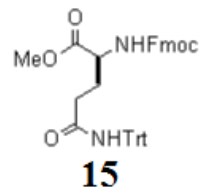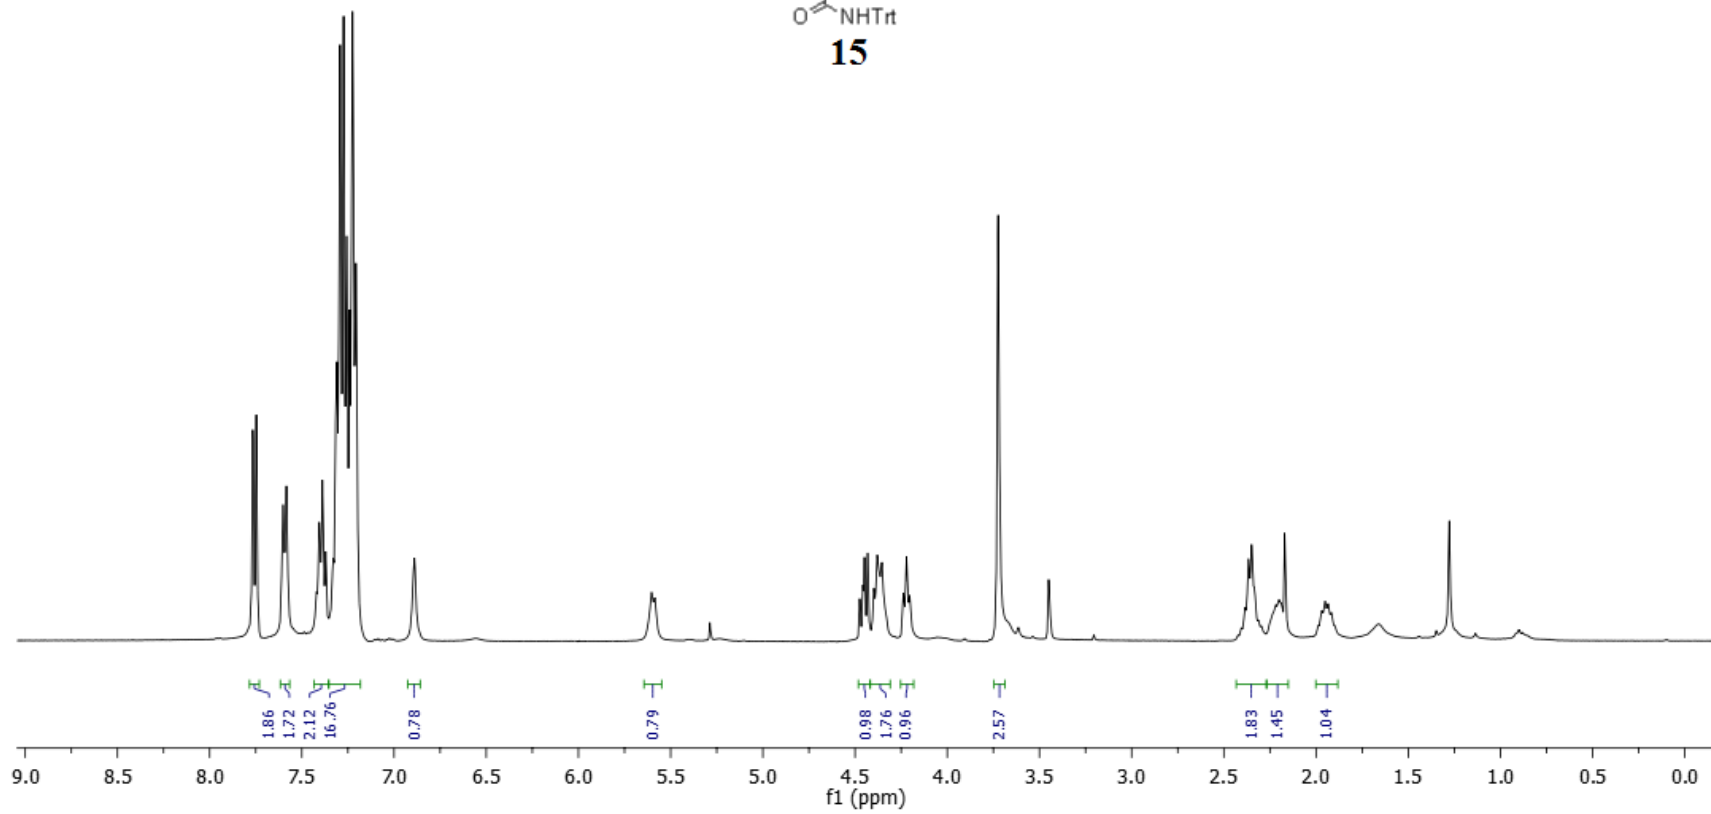

$^{13}\text{C}$  NMR Spectrum of **15** in  $\text{CDCl}_3$  (100 MHz) at 25 °C

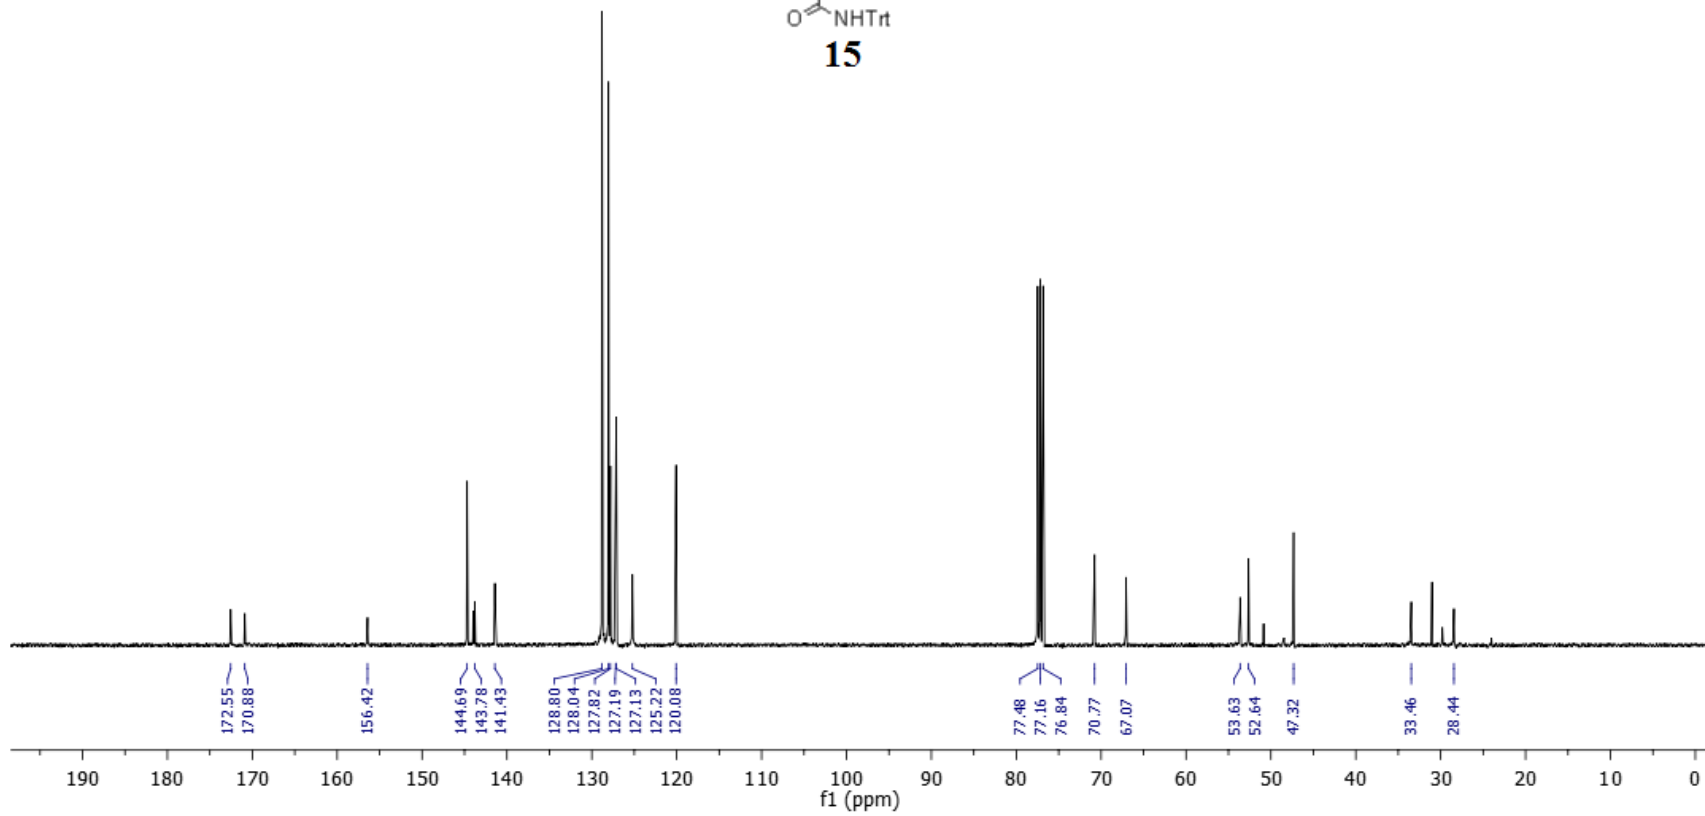

$^1\text{H}$  NMR Spectrum of **4** in  $(\text{CD}_3)_2\text{SO}$  (400 MHz) at 25 °C

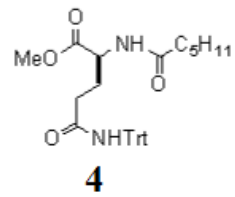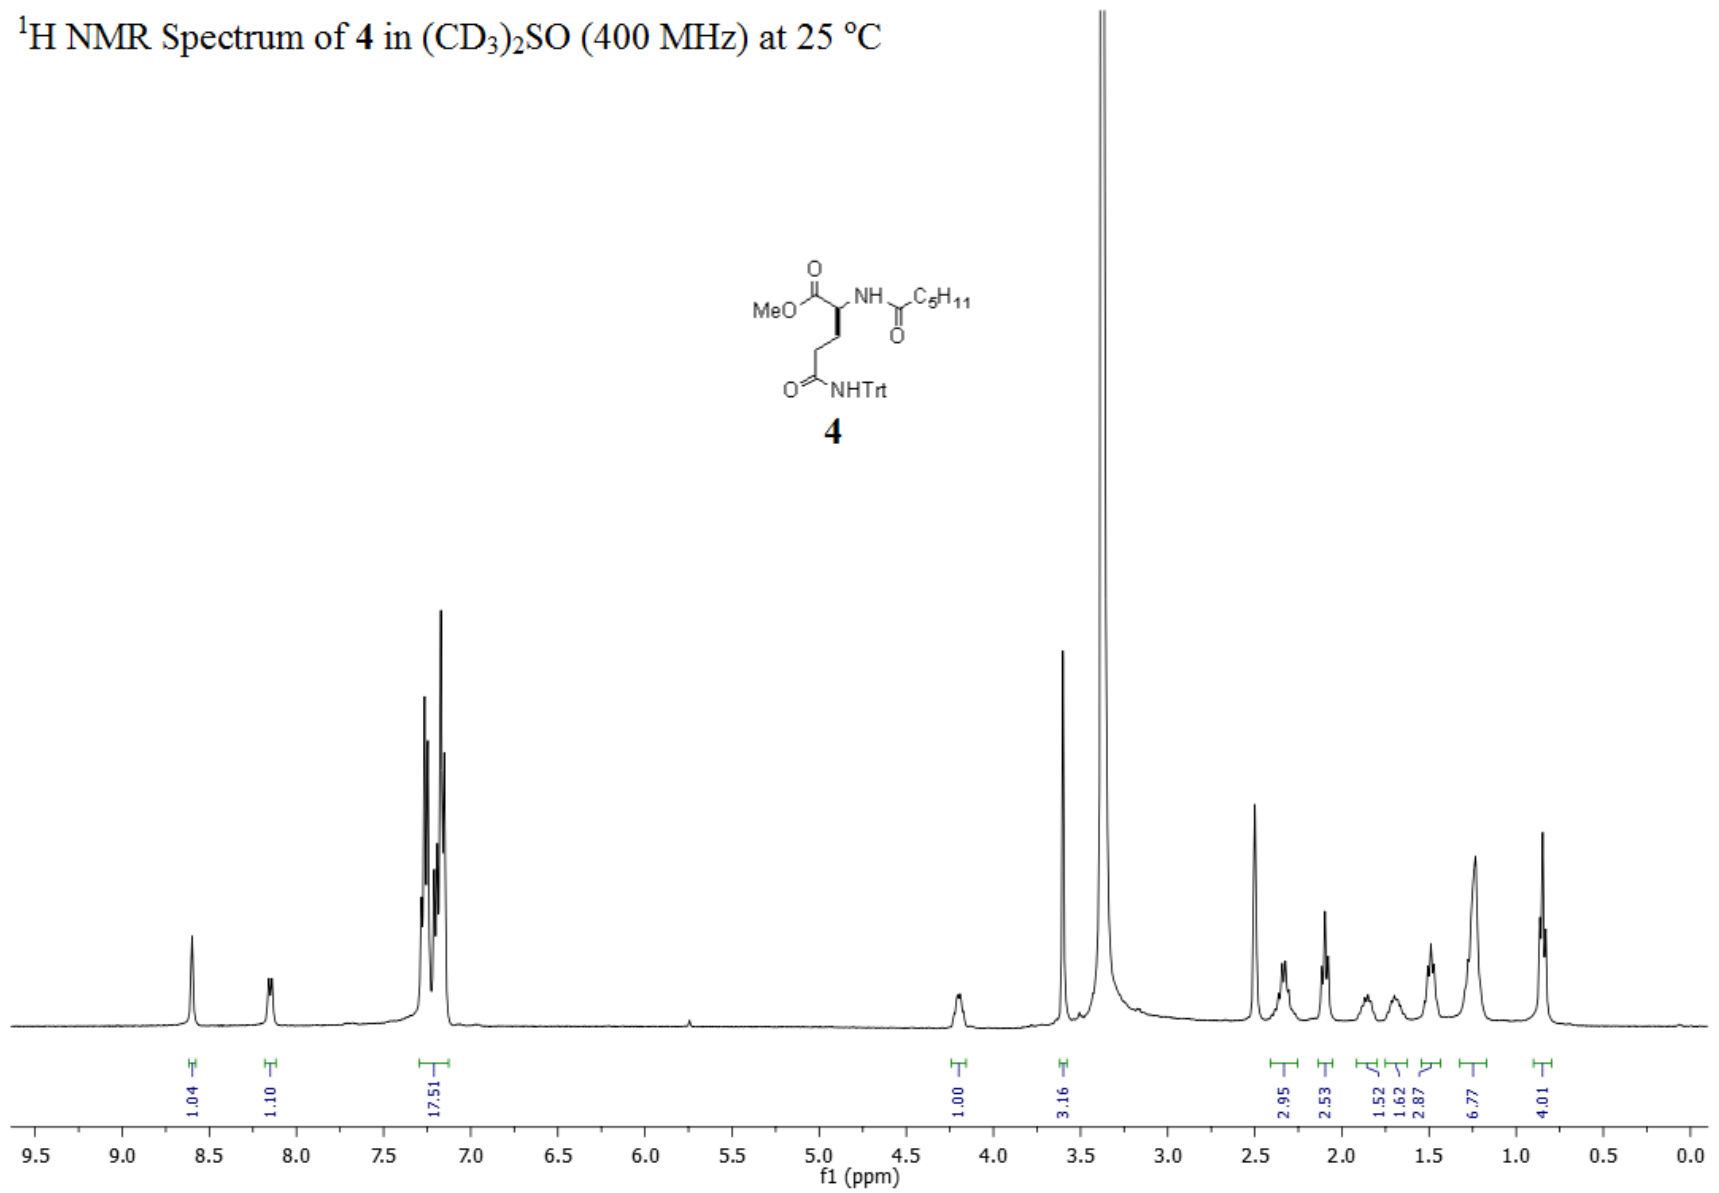

$^{13}\text{C}$  NMR Spectrum of **4** in  $\text{CDCl}_3$  (100 MHz) at 25 °C

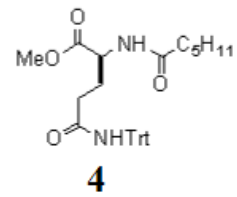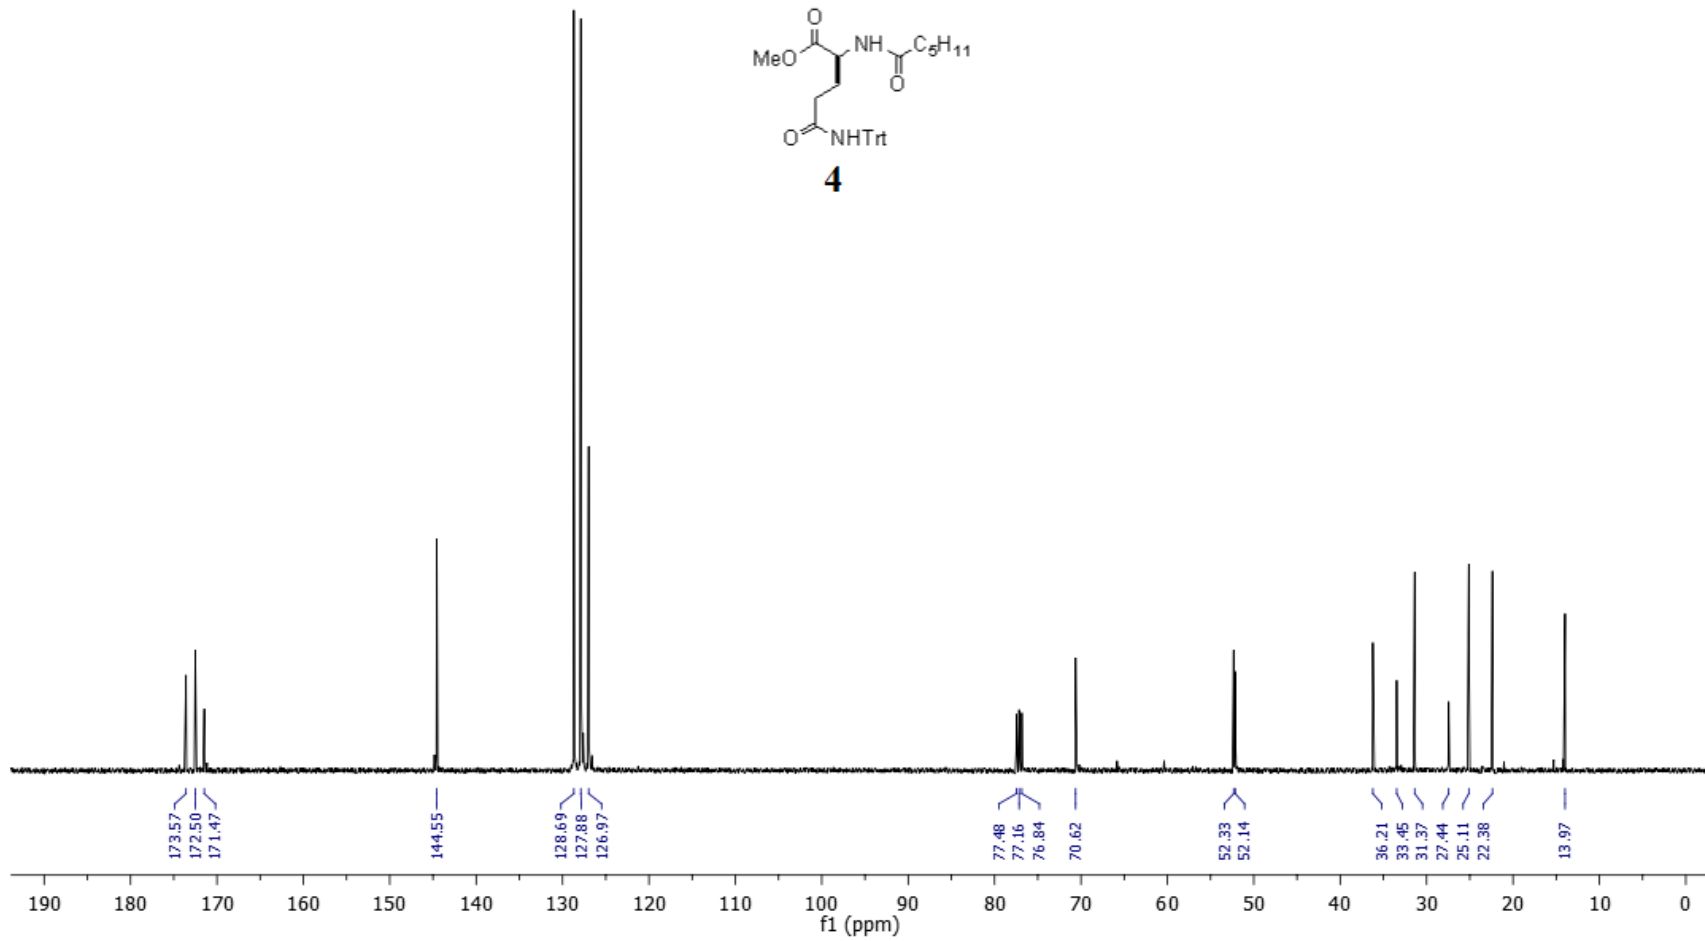

$^1\text{H}$  NMR Spectrum of **16** in  $\text{CDCl}_3$  (600 MHz) at 27 °C

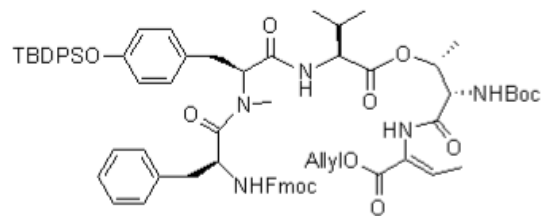

**16**

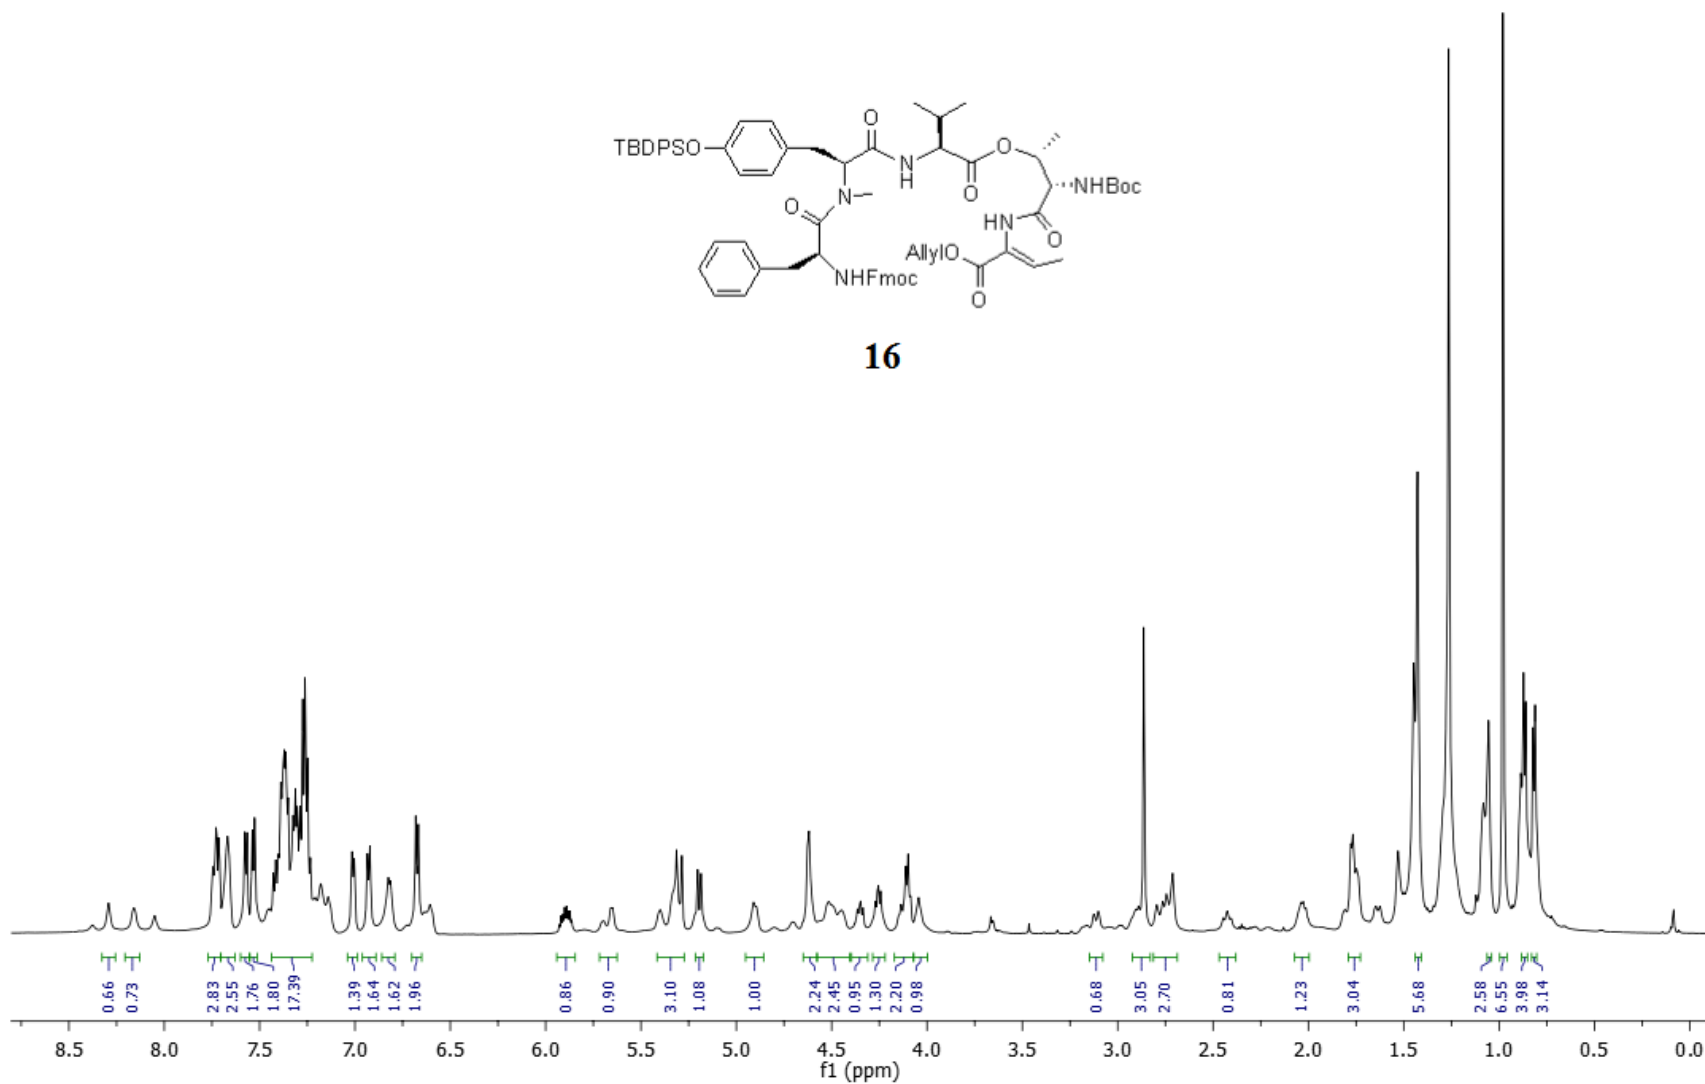

<sup>13</sup>C NMR Spectrum of **16** in CDCl<sub>3</sub> (150 MHz) at 27 °C

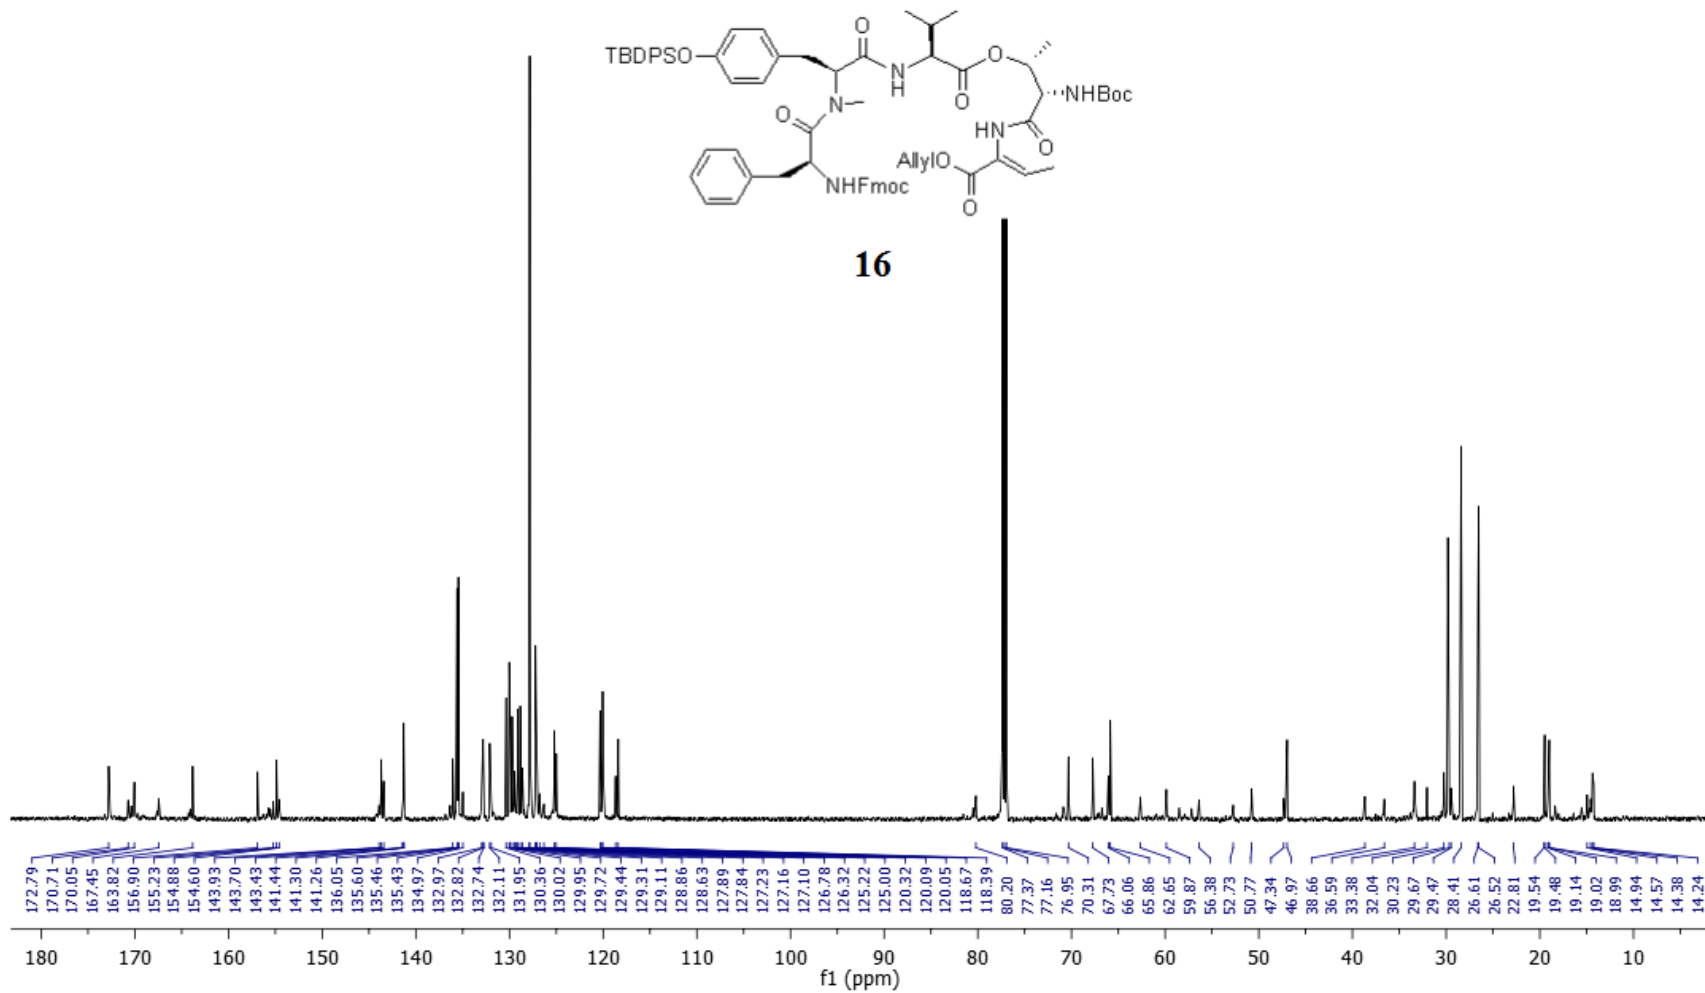



$^1\text{H}$  NMR Spectrum of **5** in  $\text{CDCl}_3$  (600 MHz) at 25 °C

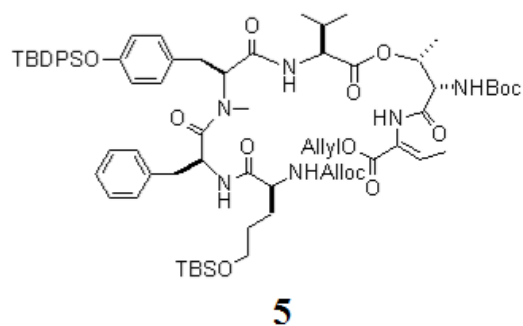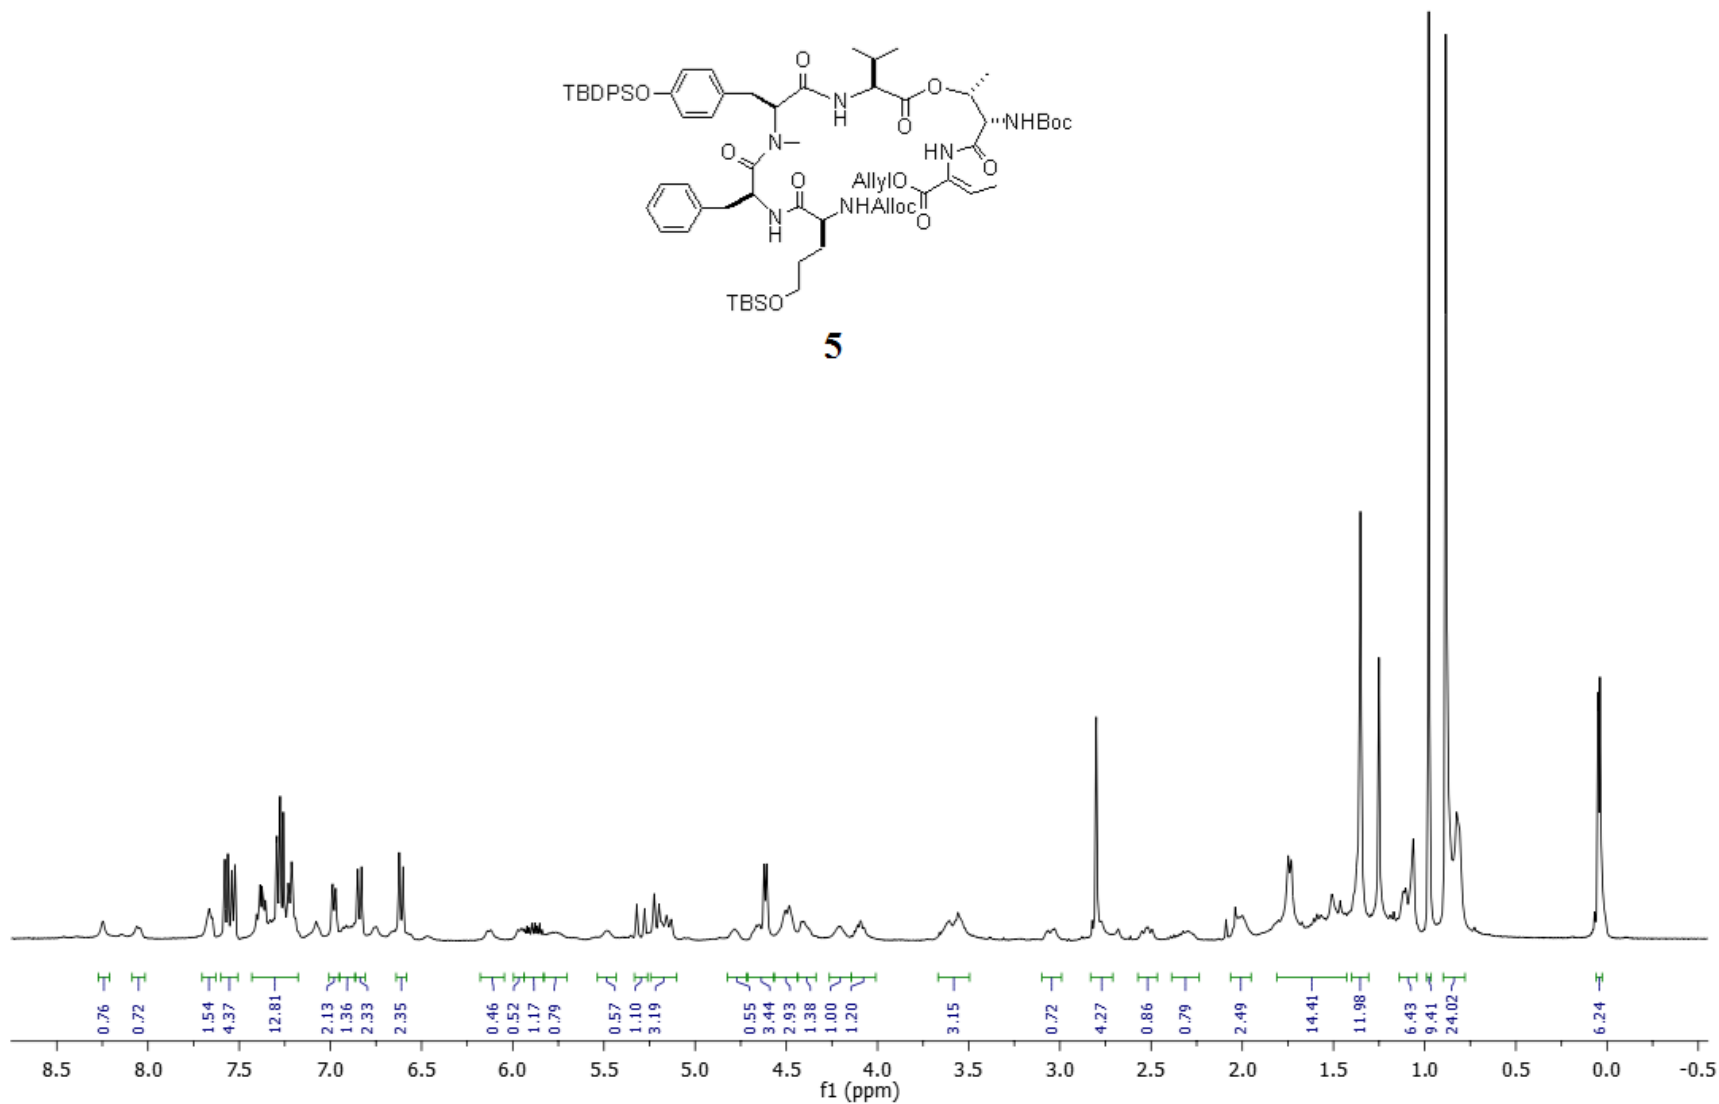

<sup>13</sup>C NMR Spectrum of **5** in CDCl<sub>3</sub> (150 MHz) at 27 °C

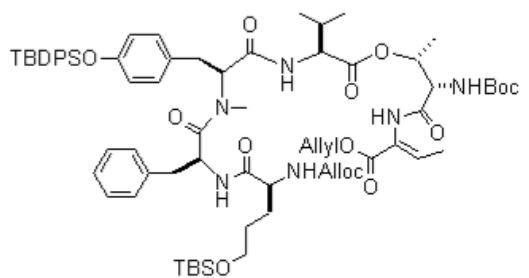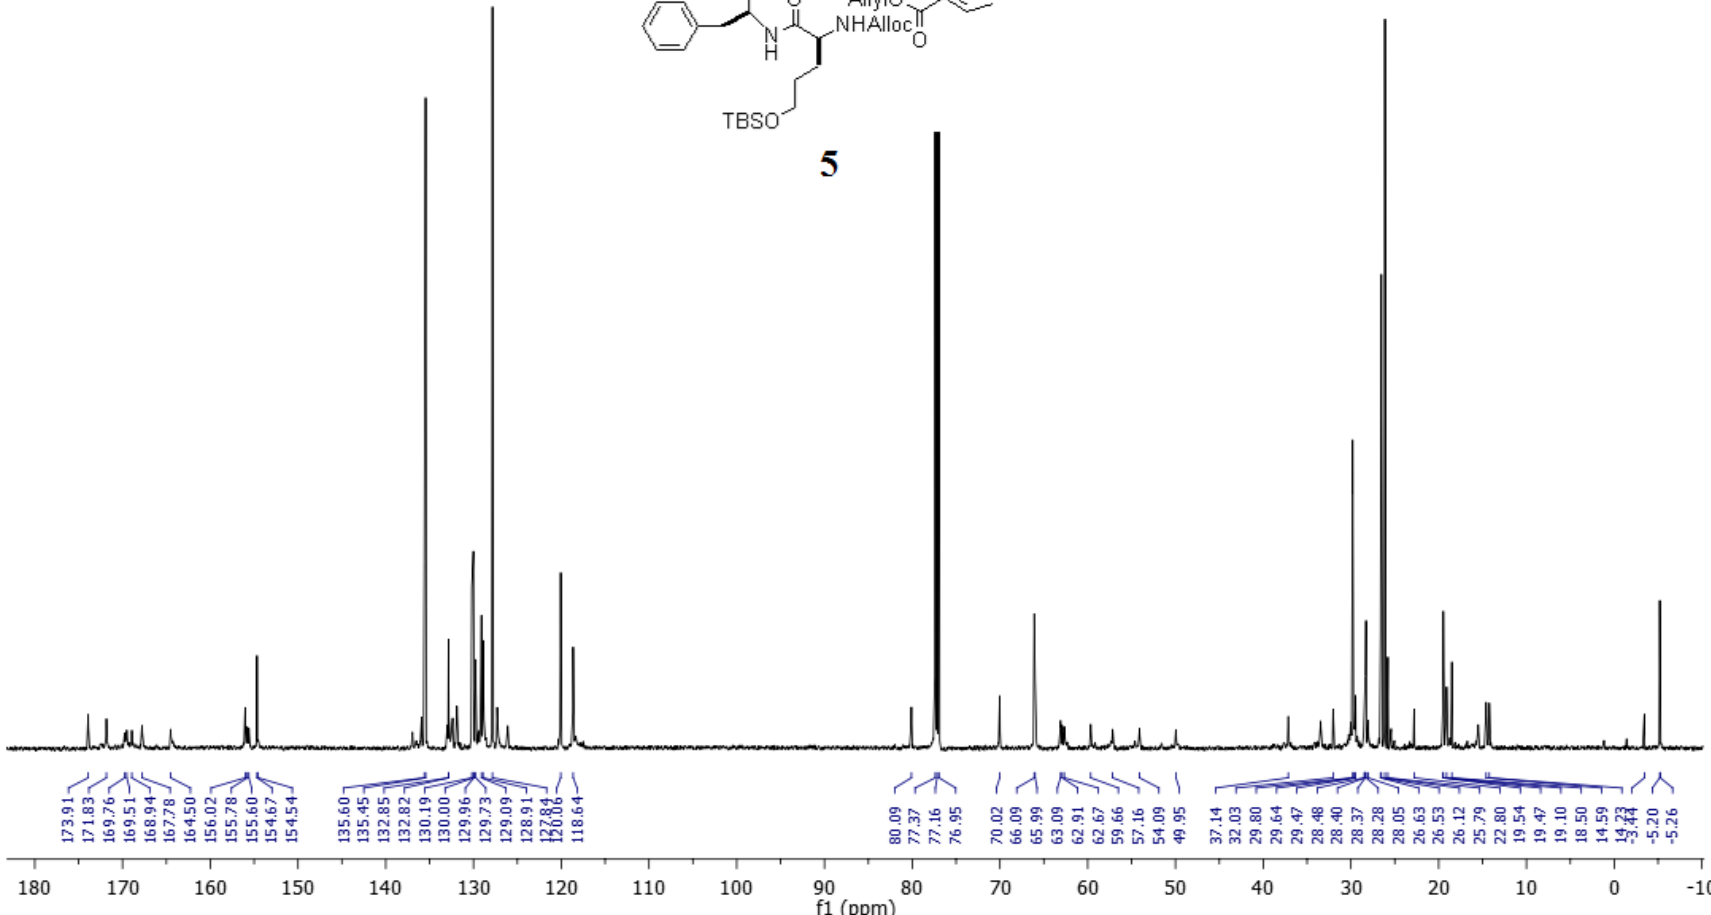

$^1\text{H}$  NMR Spectrum of **3** in  $\text{CDCl}_3$  (400 MHz) at 25 °C

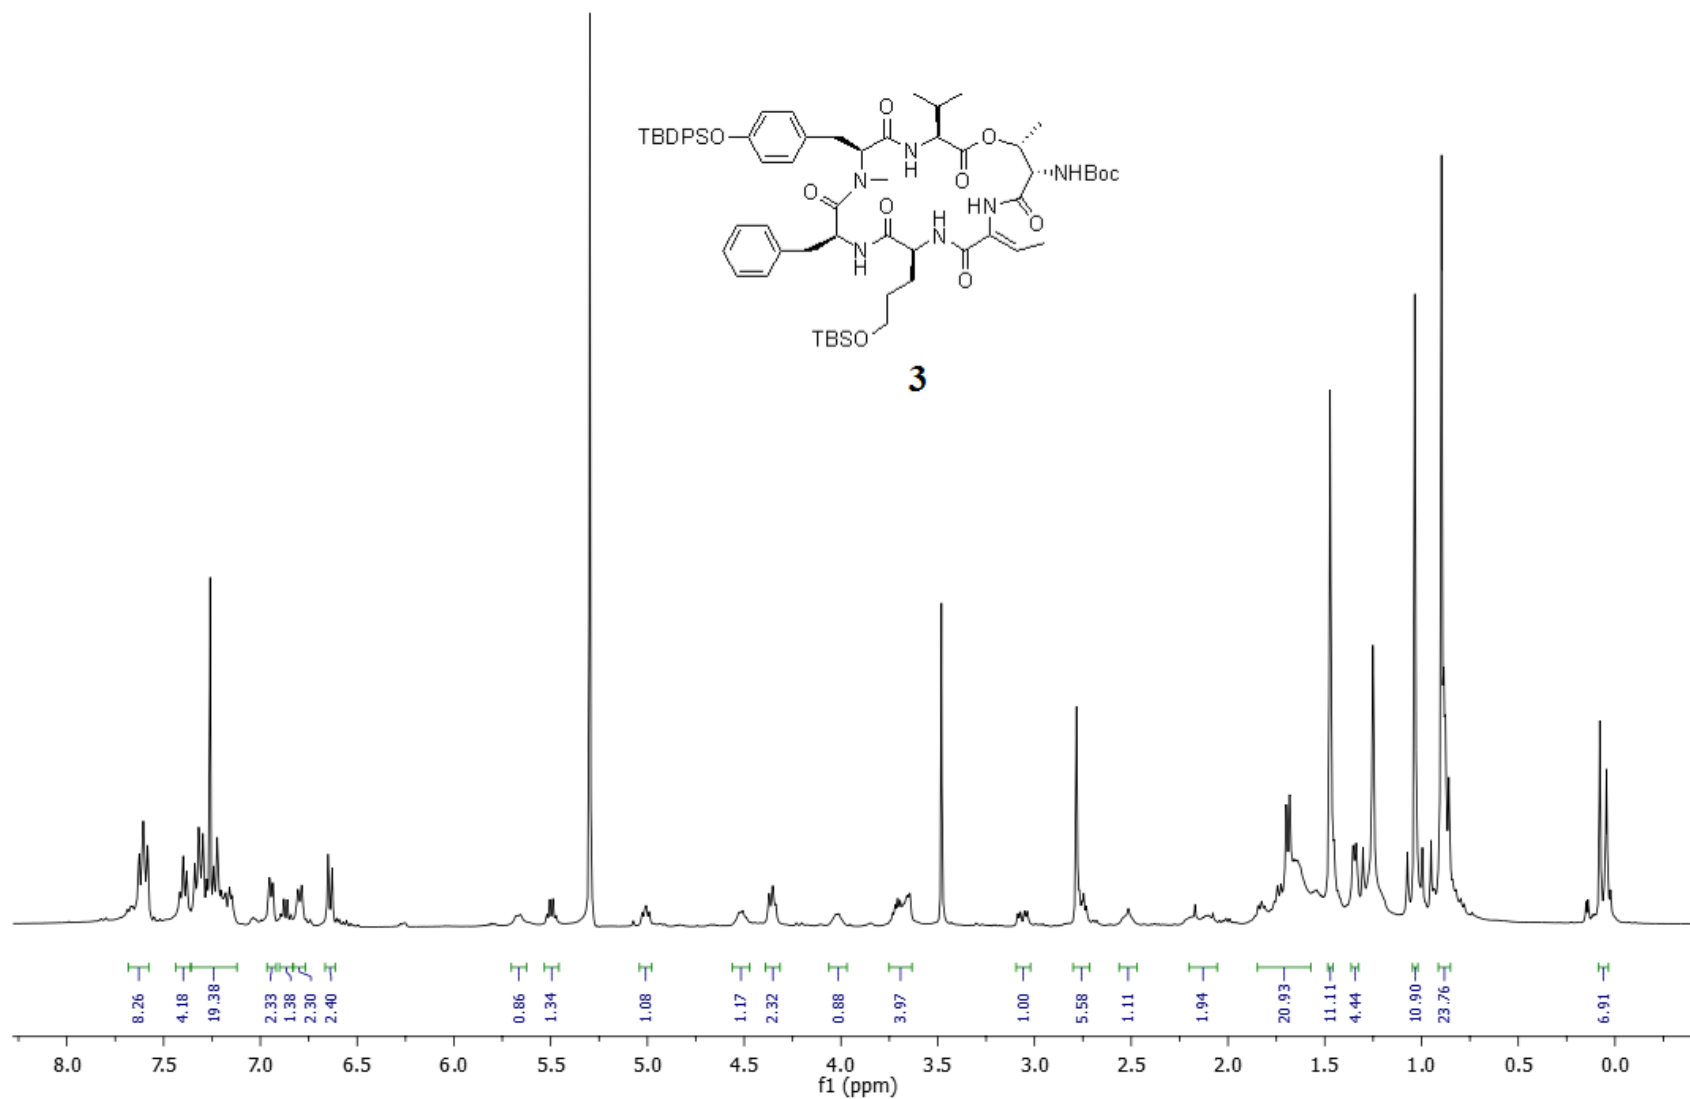

<sup>13</sup>C NMR Spectrum of **3** in CDCl<sub>3</sub> (100 MHz) at 25 °C

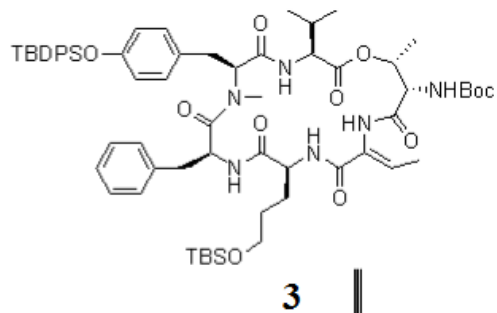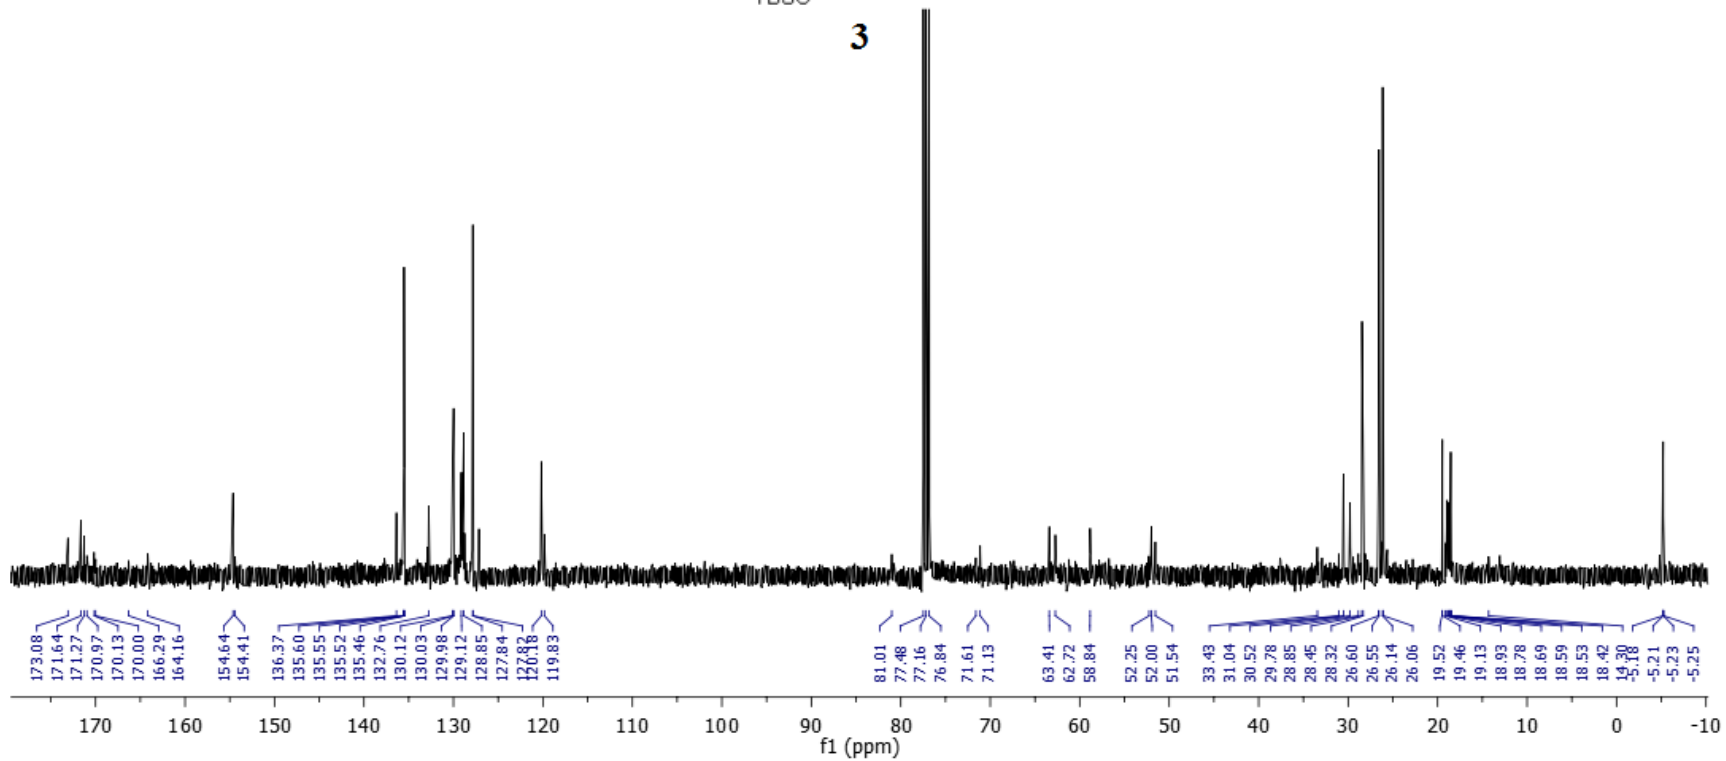

<sup>1</sup>H NMR Spectrum of **17** in (CD<sub>3</sub>)<sub>2</sub>SO (600 MHz) at 27 °C

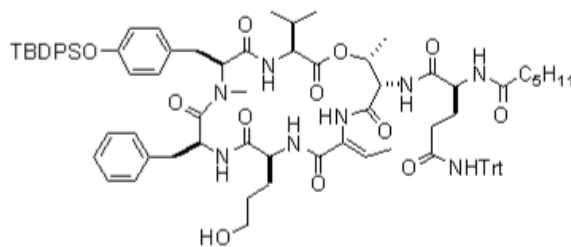

**17**

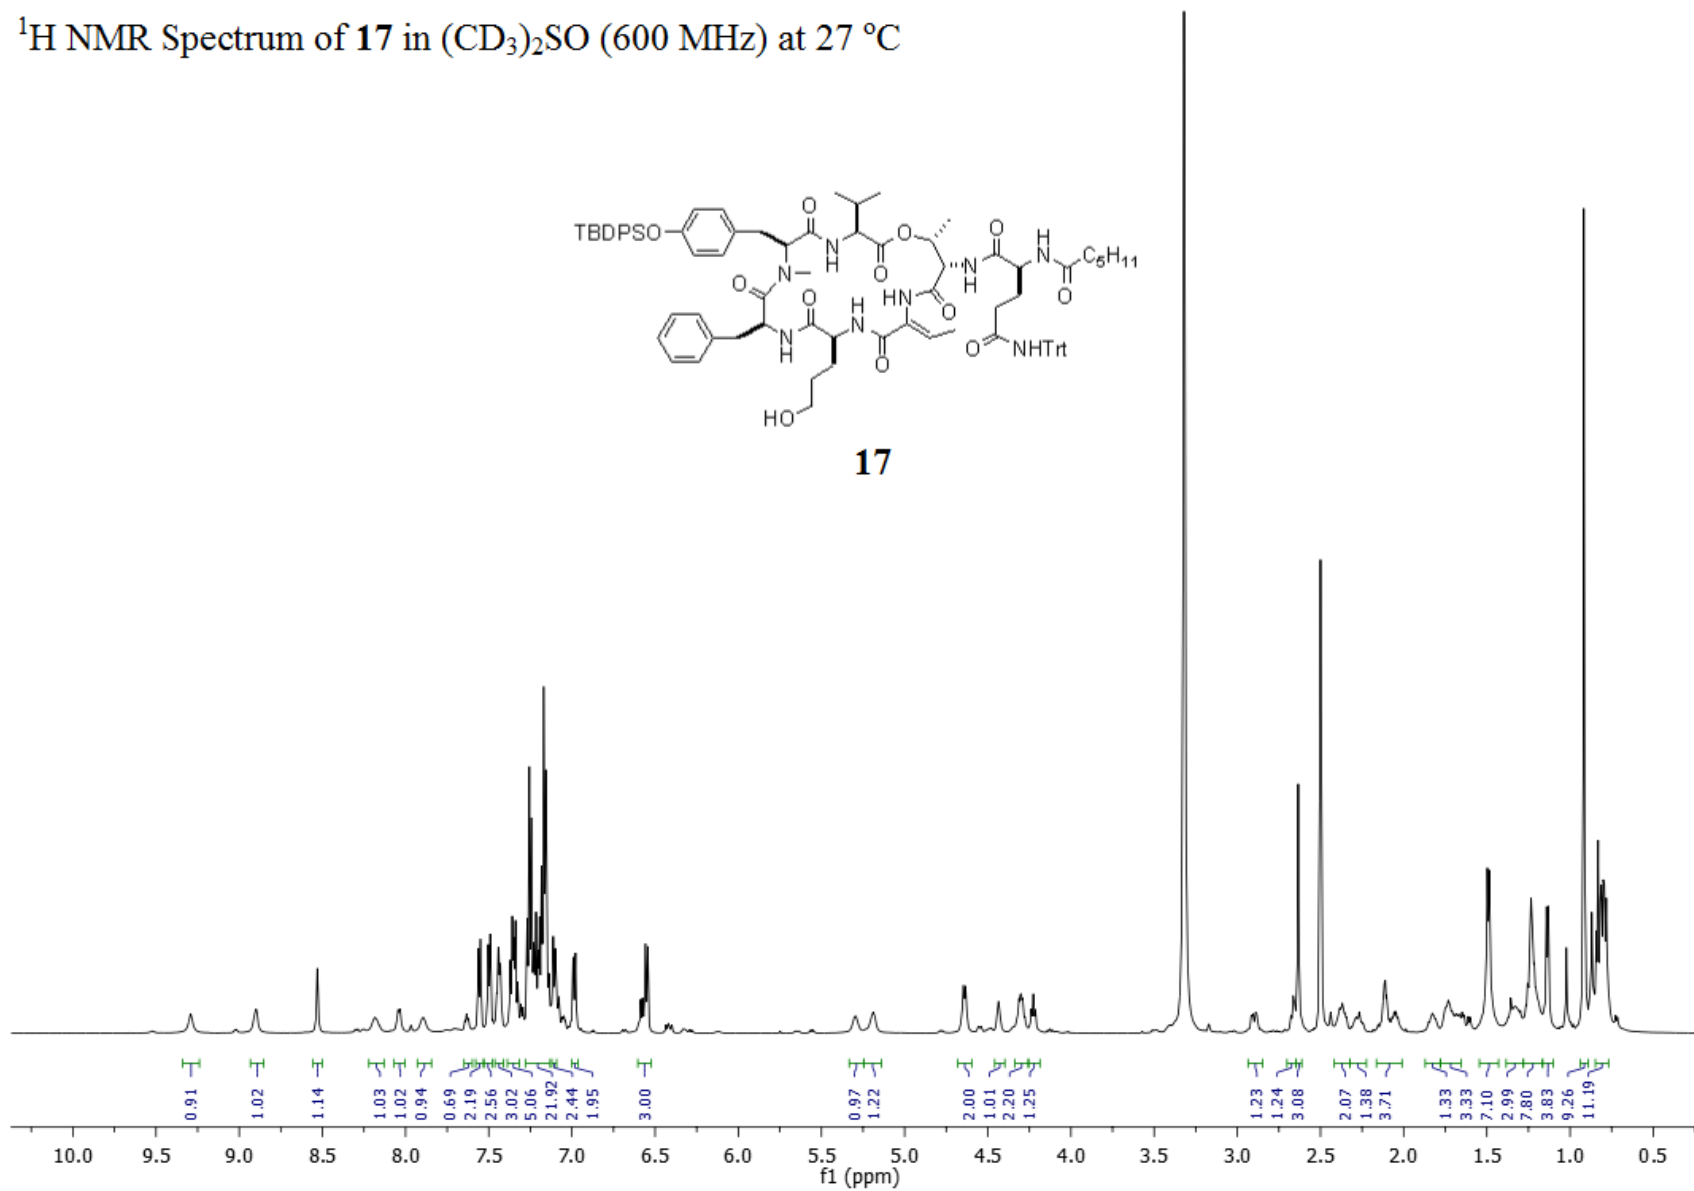



<sup>1</sup>H NMR Spectrum of **2** in (CD<sub>3</sub>)<sub>2</sub>SO (600 MHz) at 25 °C

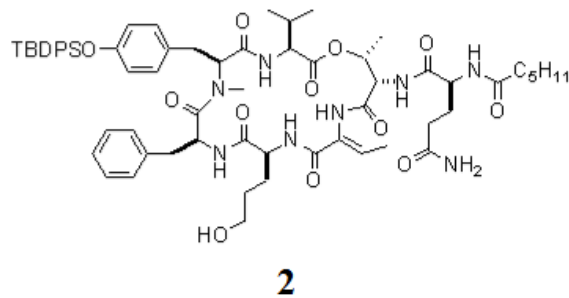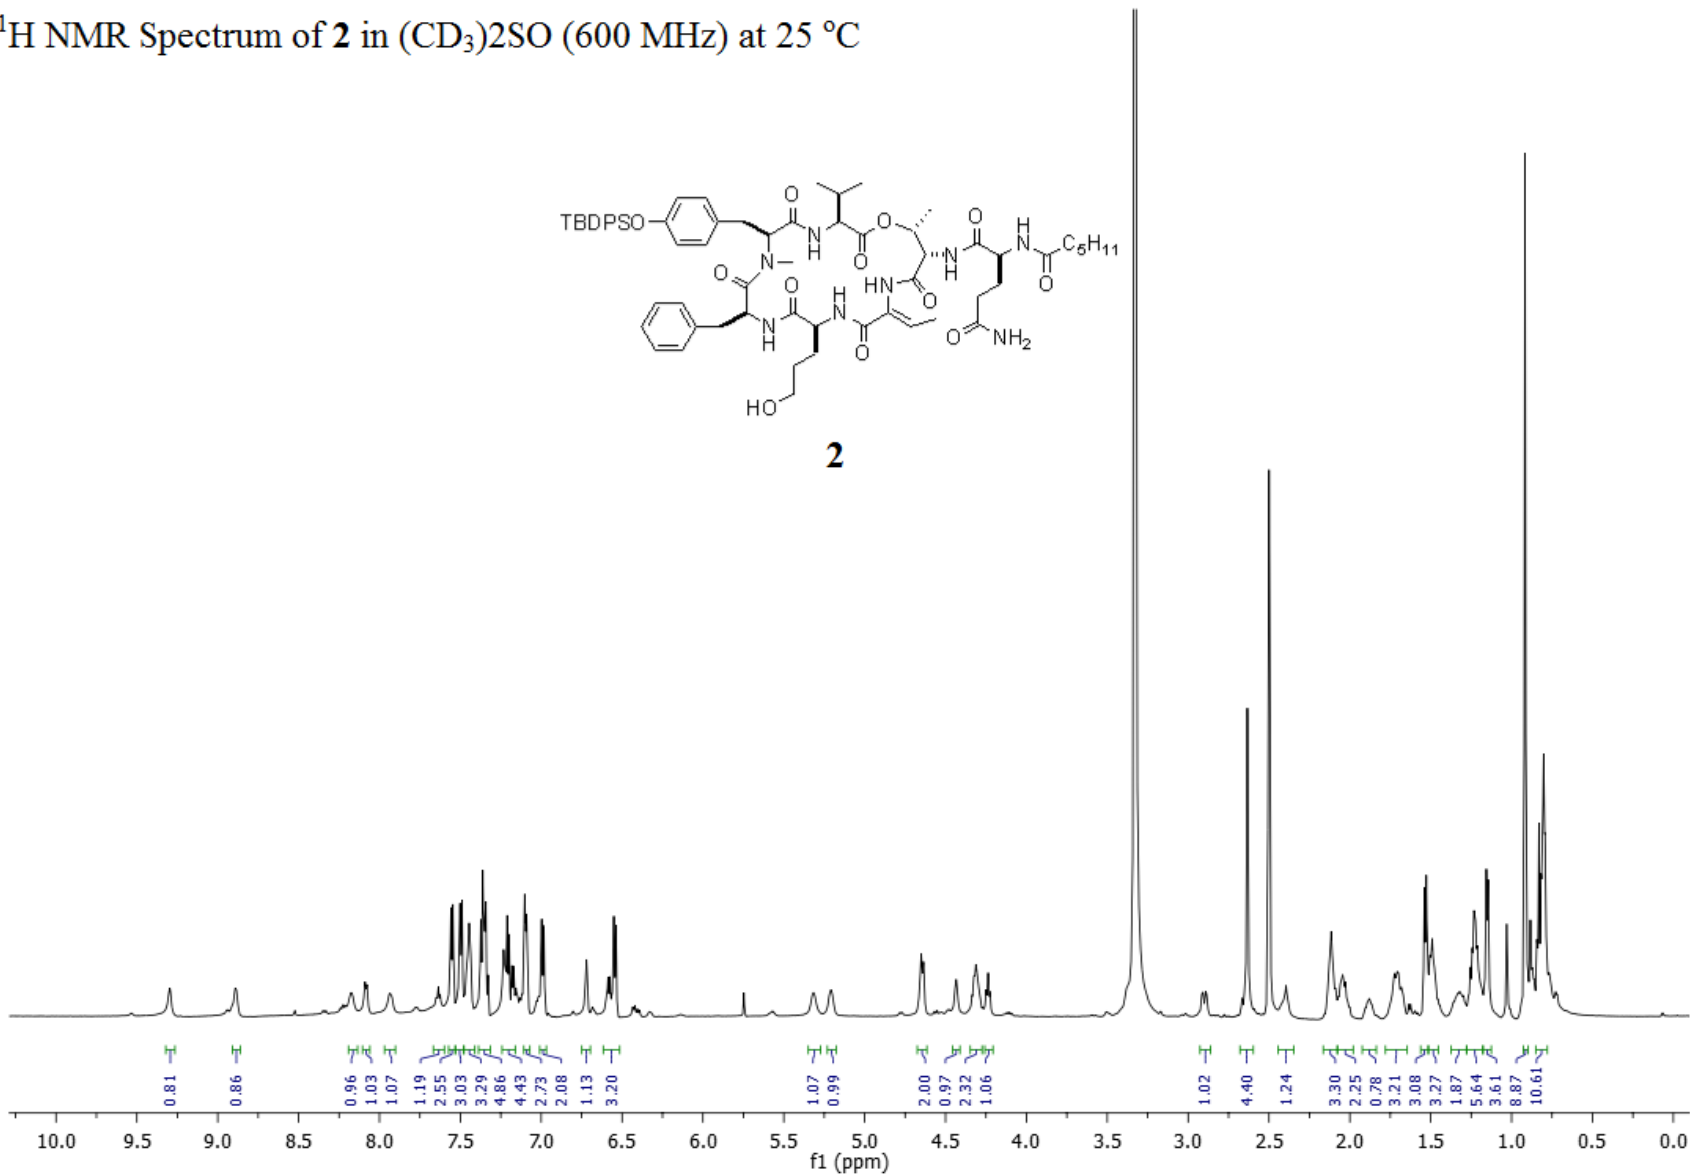

Supplement: NIHMS750762-supplement-Supp_Info_Rev.pdf [file NIHMS750762-supplement-Supp_Info_Rev.pdf]
